1 **Bacteriophage Resistance Affects *Flavobacterium columnare* Virulence Partly via**  
2 **Mutations in Genes Related to Gliding Motility and Type IX Secretion System**

3

4 Heidi M. T. Kunttu<sup>1#</sup>, Anniina Runtuvuori-Salmela<sup>1</sup>, Krister Sundell<sup>2</sup>, Tom Wiklund<sup>2</sup>,  
5 Mathias Middelboe<sup>3</sup>, Lotta Landor<sup>2\*</sup>, Roghaieh Ashrafi<sup>1</sup>, Ville Hoikkala<sup>1</sup>, Lotta-Riina  
6 Sundberg<sup>1</sup>

7

8 <sup>1</sup>Department of Biological and Environmental Science and Nanoscience Center, University of  
9 Jyväskylä, Jyväskylä, Finland

10 <sup>2</sup>Laboratory of Aquatic Pathobiology, Åbo Akademi University, Turku, Finland

11 <sup>3</sup>Department of Biology, Marine Biological Section, University of Copenhagen, Helsingør,  
12 Denmark

13

14 **Keywords:** bacteriophage, colony morphology, *Flavobacterium columnare*, gliding motility,  
15 mutation, phage resistance, type IX secretion system, virulence

16

17 #Address correspondence to Heidi M. T. Kunttu, [heidi.kunttu@jyu.fi](mailto:heidi.kunttu@jyu.fi)

18 \*Present address: Lotta Landor, Department of Biological Sciences, University of Bergen,  
19 Bergen, Norway

20

21 **Abstract**

22

23 Increasing problems with antibiotic resistance has directed interest towards phages as tools to  
24 treat bacterial infections in the aquaculture industry. However, phage resistance evolves  
25 rapidly in bacteria posing a challenge for successful phage therapy. To investigate phage  
26 resistance in the fish pathogenic bacterium *Flavobacterium columnare*, two phage-sensitive,  
27 virulent wild-type isolates, FCO-F2 and FCO-F9, were exposed to phages and subsequently  
28 analyzed for bacterial viability and colony morphology. Twenty-four phage-exposed isolates  
29 were further characterized for phage resistance, antibiotic susceptibility, motility, adhesion  
30 and biofilm formation on polystyrene surface, protease activity, whole genome sequencing  
31 and virulence against rainbow trout fry. Bacterial viability first decreased in the exposure  
32 cultures, subsequently increasing after 1-2 days. Simultaneously, the colony morphology of  
33 the phage-exposed isolates changed from original rhizoid to rough. The rough isolates arising  
34 in phage exposure were phage-resistant with low virulence, whereas rhizoid isolates  
35 maintained phage sensitivity, though reduced, and high virulence. Gliding motility and  
36 protease activity were also related to the phage sensitivity. Observed genetic mutations in  
37 phage-resistant isolates were mostly located in genes coding for type IX secretion system, a  
38 component of the flavobacterial gliding motility machinery. However, there were mutational  
39 differences between individual isolates, and not all phage-resistant isolates had genetic  
40 mutations. This indicates that development of phage resistance in *F. columnare* probably is a  
41 multifactorial process including both genetic mutations and changes in gene expression.  
42 Phage resistance may not, however, be a challenge for development of phage therapy against  
43 *F. columnare* infections, since phage resistance is associated with decrease in bacterial  
44 virulence.

45

## 46 **Importance**

47

48 Phage resistance of infectious bacteria is a common phenomenon posing challenges for  
49 development of phage therapy. Along with growing World population and need for increased  
50 food production, constantly intensifying animal farming has to face increasing problems of  
51 infectious diseases. Columnaris disease, caused by *F. columnare*, is a worldwide threat for  
52 salmonid fry and juvenile farming. Without antibiotic treatments, infections can lead to 100%  
53 mortality in a fish stock. Phage therapy of columnaris disease would reduce a development of  
54 antibiotic-resistant bacteria and antibiotic loads by the aquaculture industry, but phage-resistant  
55 bacterial isolates may become a risk. However, phenotypic and genetic characterization of  
56 phage-resistant *F. columnare* isolates in this study revealed that they are less virulent than  
57 phage-sensitive isolates and thus not a challenge for phage therapy against columnaris disease.  
58 This is a valuable information for the fish farming industry globally when considering phage-  
59 based prevention and curing methods for *F. columnare* infections.

60

## 61 **Introduction**

62

63 Aquaculture has a central role in supporting the increasing demand for high quality protein and  
64 healthy food. However, the use of chemotherapy in disease treatment in the industry has led to  
65 increased resistance of disease-causing agents to commonly used antibiotics (1, 2). Further, in  
66 the face of climate warming, production of protein with smaller carbon footprint is of  
67 increasing importance. This has put a pressure on aquaculture industry to increase efficiency  
68 in food production, which also means developing more effective ways to fight infectious  
69 diseases in intensive farming including reduction the use of antibiotics. Although vaccines  
70 against many microbial diseases are in use globally in aquaculture, there are still many diseases

71 with no potent immunization method available (3). This applies especially to infections of fish  
72 fry, where efficiency of vaccination is poor due to lack of development of fish secondary  
73 immunity at the early life stage.

74

75 One of these diseases affecting fry is caused by the fish pathogenic bacterium *Flavobacterium*  
76 *columnare*, the infectious agent of columnaris disease. Columnaris infections cause extensive  
77 losses in farmed salmonid fry and juveniles, populations of different catfish species and ayu  
78 (*Plecoglossus altivelis*) around the world in water temperatures above 18 °C. The only effective  
79 curing method is antibiotic treatment. However, infections often occur repeatedly and may  
80 cause up to 100% mortality in rainbow trout fry populations if not treated, thus causing major  
81 economic losses to the industry (4, 5). In addition, elevated water temperatures due to warmer  
82 summers in the recent years are suggested to enhance virulence development in *F. columnare*  
83 (5). Although antibiotic resistance in this bacterium is not yet as severe problem as in related  
84 pathogens, e.g. *Flavobacterium psychrophilum* (6, 7) or *Vibrio* species (8, 9), strains that have  
85 acquired resistance towards commonly used antibiotics already exist (10).

86

87 Bacteriophages (phages) are viruses that specifically infect their host bacteria, without harming  
88 the surrounding microbial community (reviewed in 11). Among the alternatives to traditional  
89 antibiotics, phage therapy, i.e. the use of phages against bacterial infections, has demonstrated  
90 a strong potential for controlling disease outbreaks in aquaculture (e.g. 12-14). Promising  
91 results have been gained also in phage therapy trials of Flavobacterial infections. In a study by  
92 Castillo et al. (15), phage treatment reduced the mortality of *F. psychrophilum*-infected  
93 Atlantic salmon (*Salmo salar*) by 60 % and rainbow trout (*Oncorhynchus mykiss*) by 67 %. In  
94 studies with columnaris infections, mortality of zebra fish (*Danio rerio*) and rainbow trout were  
95 reduced by 100 % and nearly 42 %, respectively, in the presence of phages (16). In addition,

96 pre-colonization of fish with phage significantly slowed down the infection and reduced the  
97 mortality of rainbow trout (17).

98

99 One of the biggest challenges for phage therapy is the imposed selection for phage resistance  
100 among phage-exposed bacteria. Bacteria have developed a variety of phage defence strategies,  
101 including surface modification and cell aggregation, inactivation of intruding phage DNA by  
102 Restriction-Modification and CRISPR-Cas systems, proteolytic digestion of phage particles,  
103 and quorum sensing regulation of phage receptor expression (e.g. 18- 20). The prevalence and  
104 control of these resistance mechanisms depend specifically on the phage-bacterium interaction,  
105 on the type and function of the receptor, and the costs of engaging the different mechanisms  
106 under various environmental conditions. In many pathogenic bacteria the cell surface  
107 molecules are functioning as virulence factors, and phage-driven changes in these structures  
108 leading to phage resistance often lead to simultaneous reduction in virulence (21). This trade-  
109 off has been detected also among several bacterial fish pathogens, e.g. in *Pseudomonas*  
110 *plecoglossicida* (22), *F. psychrophilum* (23) and *Vibrio anguillarum* (24).

111

112 Exposing *F. columnare* to phages has been observed to cause a change in colony morphotype  
113 from the ancestral rhizoid form to rough, which is associated with loss of gliding motility and  
114 virulence (25-27). Since a change in colony morphology and loss of virulence have been  
115 observed previously also by deletion of genes in the Type IX secretion system involved in  
116 gliding motility of *F. columnare* (28), it is likely that mutations in this secretion system are  
117 also linked with phage resistance in *F. columnare* (29). Yet, the exact mechanisms by which  
118 phages cause the colony morphology change in *F. columnare*, and the functional implications  
119 for the bacteria have not been previously explored.

120

121 Understanding the mechanisms and consequences of phage resistance in the target bacteria is  
122 central for development of successful phage therapy. Thus, in this study, we exposed two *F.*  
123 *columnare* isolates (FCO-F2 and FCO-F9) separately to three different phages, and studied  
124 infection dynamics, bacterial viability and colony morphology, and isolated phage-resistant  
125 bacteria. Twenty-four phage-exposed and no-phage control isolates were further characterized  
126 for their phage resistance, antibiotic susceptibility, motility, adhesion and biofilm formation on  
127 polystyrene surface, protease (elastinase, gelatinase and caseinase) activity, virulence on  
128 rainbow trout fry, and whole genome sequence. Our results show, that if phage resistance in *F.*  
129 *columnare* is gained via surface modification leading to morphotype change, virulence  
130 decreases. However, if the colony morphology remains rhizoid, the isolates remain highly  
131 virulent with reduced sensitivity to phage compared to the ancestral wild-type strain.

132

## 133 **Results**

134

### 135 *Isolates from phage-exposures: growth, colony morphology and phage resistance*

136

137 In all phage-exposure cultures of FCO-F2, there was a strong initial phage control of the host  
138 population during the first day in all the phage-exposed cultures compared with control culture  
139 without phages (Figure 1a). After this, the bacterial density started to recover. The phage-free  
140 cultures grew exponentially during the first day, after which they reached a plateau phase.  
141 Along with the population decline on day 1, bacterial colony morphotype changed from  
142 ancestral rhizoid to rough (Figure 2). From day 1 onwards, more than 88% of the colonies  
143 formed by phage-exposed bacterial isolates were rough, the amount reaching at least 97% at  
144 the end of the experiment (Figure 1c). In addition, in FCOV-F25 exposure, few soft colonies

145 were observed on day 2 (Figure 2), and in no-phage control cultures, some rough colonies  
146 appeared among the prevailing rhizoid ones.

147

148 FCO-F9 showed slightly different growth dynamics. The bacterial population size increased  
149 exponentially during the first day in all cultures (Figure 1b), but decreased drastically on day  
150 2 in response to phage exposure, and then reached exponential growth again. The phage-free  
151 cultures reached a plateau phase on day 2, after which the amount of culturable bacteria  
152 decreased. From the day 2 population crash and onwards, more than 85% of the colonies  
153 formed by phage-exposed bacteria had rough morphology (Figure 1d). At the end of the  
154 experiment, more than 98% of the colonies were rough. In FCOV-F13 exposure, a few rough  
155 colonies were observed already on day 1 and some soft colonies on days 2 and 3. In no-phage  
156 control cultures, some (4 %) rough colonies appeared among the rhizoid ones on day 3.

157

158 Out of 189 colonies collected from phage exposures, 20 phage-exposed and 4 no-phage control  
159 isolates were characterized further (Table 2). Of these isolates, the no-phage control isolates  
160 all formed rhizoid colonies similar to their wild-type parent, phage-sensitive isolates FCO-F2  
161 and FCO-F9. Most of the phage-exposed isolates were of rough colony morphology, but  
162 F2R58, F2R66 and F9R56 had rhizoid, and F9R69 soft colony morphology.

163

164 All the phage-exposed rough isolates were resistant to all the phages used to infect the ancestor  
165 wild-type bacteria (Table 2). In addition, in some cases, phage caused inhibition of bacterial  
166 growth, considered as phage resistance because no clear plaques due to phage infection were  
167 detected. The rhizoid phage-exposed isolates turned out to be partly phage-resistant with a  $5.5$   
168  $\times 10^5$  to  $11 \times 10^5$ -fold reduction in phage susceptibility compared to the wild type isolates,

169 depending on the specific phage (results not shown). Throughout this paper, these isolates with  
170 decreased phage sensitivity are grouped together with the phage-sensitive isolates.

171

### 172 *Antibiotic susceptibility*

173

174 All isolates showed antibiotic susceptibility patterns similar to the parent wild-type isolates,  
175 and no notable differences were observed (Figure S1 and Table S1).

176

### 177 *Motility, adhesion and biofilm formation*

178

179 Phage-sensitive bacteria forming rhizoid colonies were significantly more motile (determined  
180 as colony spreading) than phage-resistant rough or soft morphotypes, irrespective of isolation  
181 history (F2-isolates:  $P < 0.001$ , Oneway ANOVA, LG10 transformation; F9-isolates:  $P \leq$   
182  $0.004$ , Mann-Whitney test) (Figure 3).

183

184 Compared to the parent wild-type FCO-F2 isolate, there was a large variability on the adhesion  
185 capacity of individual phage-resistant F2-isolates (Figure 4a). Phage susceptibility (rhizoid vs.  
186 rough colony type) or phage used in the co-culture experiment did not influence bacterial  
187 adhesion capacity ( $P = 0.3$ : Mann-Whitney test and  $P = 0.564$ : Kruskal-Wallis test,  
188 respectively).

189

190 Most of the individual phage-exposed and no-phage control F2-isolates had significantly lower  
191 biofilm forming capacity than in parent wild-type FCO-F2 ( $P \leq 0.017$ : Oneway ANOVA, LDS  
192 multiple comparisons, square root transformation) (Figure 4c). Still, there was no statistical



193 difference in biofilm formation between phage-sensitive rhizoid and resistant rough  
194 morphology F2-isolates ( $P = 0.062$ : Oneway ANOVA).

195

196 Again, the bacterial strain F9 behaved differently compared to F2. In contrast to the phage-  
197 resistant F2-isolates, the phage-resistant rough and soft morphology F9-isolates had  
198 significantly lower adherence than sensitive rhizoid isolates ( $P < 0.001$ : Oneway ANOVA,  
199 LDS multiple comparisons, square root transformation) (Figure 4b). In addition, isolates  
200 exposed to phages isolated in 2017, FCOV-F13 and FCOV-F45, had significantly lower  
201 adhesion capacity than in isolates exposed to FCL-2 isolated in 2009 ( $P < 0.001$ : Mann-  
202 Whitney test). This may indicate phage FCL-2 uses different phage receptor (see later).

203

204 In contrast to adhesion ability, biofilm forming capacity of the most of the individual phage-  
205 exposed and no-phage control F9-isolates was significantly higher compared to wild-type  
206 parent isolate ( $P \leq 0.004$ : Oneway ANOVA, LDS multiple comparisons) (Figure 4d). F9R69  
207 with soft colony morphology did not form any biofilm and thus excluded from the multiple  
208 comparisons. Phage-resistant rough F9-isolates had significantly higher biofilm forming  
209 capacity than sensitive rhizoid morphotypes ( $P < 0.001$ : Oneway ANOVA, square root  
210 transformation).

211

212 *Protease activity: elastinase, gelatinase and caseinase*

213

214 Elastinase activity was detected in the wild-type, and all the phage-sensitive rhizoid FCO-F2  
215 isolates and one resistant rough F2-isolate (clear zone ratio  $> 1$ ), whereas all remaining  
216 resistant, rough morphology isolates, had completely lost the ability to degrade elastin (Figure  
217 5a). There were no differences in elastinase activity between the elastinase positive isolates ( $P$

218 = 0.843: Oneway ANOVA). Elastinase activity was not detected in any of the F9-isolates (clear  
219 zone ratio = 1) (Figure 5b).

220

221 There were variations in gelatinase activity between individual F2- and F9-isolates (Oneway  
222 ANOVA, LDS multiple comparisons) (Figure 5c and d). However, among both F2- and F9-  
223 isolates, gelatinase activity of phage-resistant rough morphotypes was lower than that of  
224 sensitive rhizoid morphotypes (F2-isolates:  $P = 0.018$ , Oneway ANOVA, exponential  
225 transformation; F9-isolates:  $P < 0.001$ , Oneway ANOVA). Two of the phage-exposed F9-  
226 isolates (F9R69 and F9R78) did not have any gelatinase activity and were thus excluded from  
227 the multiple comparisons

228

229 Less variation in caseinase activity between individual isolates was observed (Oneway  
230 ANOVA, LDS multiple comparisons) (Figure 5e and f), and phage-sensitive rhizoid and  
231 resistant rough F2-isolates did not differ from each other ( $P = 0.058$ : Oneway ANOVA. On the  
232 other hand, caseinase activity of phage-resistant rough and soft F9-isolates was lower than that  
233 of sensitive rhizoid isolates ( $P = 0.007$ : Oneway ANOVA).

234

235 *Virulence*

236

237 Rainbow trout fry were exposed to wild-type, phage-exposed and no-phage control isolates,  
238 and all of them caused mortality during 24 h (Figure 6). The phage-sensitive rhizoid  
239 morphotypes were most virulent, causing 100 % mortality, whereas resistant rough and soft  
240 morphotypes were less virulent, causing 46.7 % mortality at highest (except for phage-resistant  
241 rough morphotype F2R70, which caused 100 % mortality). Mortality of control fish was 15 %,  
242 but no bacterial growth was observed from these fish. However, *F. columnare* growth was

243 observed from all the fish exposed to bacteria. Colony morphotype of the bacterial isolates did  
244 not change during the infection.

245

246 When comparing the data according to the phage susceptibility and thus colony morphology,  
247 cumulative mortality of fish infected with phage-sensitive rhizoid morphotypes, irrespective of  
248 if they were wild-type, phage-exposed or no-phage control isolates, was significantly higher  
249 than mortality caused by phage-resistant rough or soft morphotypes among both F2 and F9  
250 isolates ( $P < 0.001$ , Kaplan-Meier Survival Analysis). Also, the estimated survival time  
251 (Kaplan-Meier Survival Analysis) was shortest in fish infected with sensitive rhizoid isolates  
252 (Figure 6). In case of F2-isolates, mortality caused by phage-resistant rough isolates was also  
253 significantly higher than mortality of control fish, but mortality caused by resistant rough and  
254 soft F9-isolates did not differ from each other or from the control fish mortality. Mortality  
255 caused by rhizoid phage-sensitive F2 isolates started to peak at 12 hours post infection (p.i.)  
256 and in F9 at 16 hours p.i. ( $P < 0.001$ , Kaplan-Meier Survival Analysis), but between rough  
257 phage-resistant F2 and F9 isolates the mortality patterns were more similar starting to increase  
258 slowly at 2-3 hours p.i. ( $P = 0.217$ , Kaplan-Meier Survival Analysis). However, there were  
259 differences in cumulative mortalities caused by individual isolates in each morphology group  
260 (Data set S1).

261

262 *Whole genome sequencing*

263

264 Genome data of wild-type *F. columnare* isolates FCO-F2 and FCO-F9 is presented in Table 4.

265

266 Genomic comparisons between F2 wild type and phage-exposed isolates revealed a limited  
267 number of genomic changes. In seven out of 11 isolates, single mutation leading to formation

268 of wrong or truncated proteins was observed in the phage-resistant mutants (Table 5). Notably,  
269 the majority of the mutations were located in genes coding for gliding motility proteins *gldB*  
270 (F2R67), *gldN* (F2R72) and *sprA* (F2R60, F2R64, F2R65, F2R74). Isolate F2R70 had one  
271 nucleotide insertion in OmpH family outer membrane protein coding gene. Three isolates  
272 (F2R62, F2R66, F2R68) did not show any genomic changes relative to the wild type. In isolate  
273 F2R58 with decreased phage sensitivity, one nucleotide change in *rlmF* gene (coding for rRNA  
274 large subunit methyltransferase F) did not lead to amino acid change. No mutations were  
275 observed in the no-phage control isolates. At certain points of ribosomal RNA operons in all  
276 phage-exposed and no-phage control isolates, and also in a 736 221 bp sequence (hypothetical  
277 protein coding sequence in wild-type FCO-F2 genome used as a reference) in phage-exposed  
278 isolates F2R66 and F2R68, there was a poor coverage of reads leading to unclear sequences,  
279 which prevented detection of possible mutations in this region.

280

281 In F9 phage-exposed isolates, one or two mutations per isolate in all the other isolates, except  
282 for F9R58, were observed (Table 6). Mutations in isolates exposed to FCOV-F45 had  
283 insertions whereas FCOV-F13 exposed isolates had deletions or single nucleotide changes in  
284 genes coding for gliding motility proteins *gldG* (F9R72), *gldM* (F9R64, F9R69, F9R78) and  
285 *gldN* (F9R69, F9R75), leading to formation of wrong or truncated proteins. Interestingly, in  
286 the isolate F9R69 (exposed to FCOV-F13) with a soft colony type, a deletion of genomic region  
287 of 4 701 bp was observed, spanning over gliding motility genes *gldM* and *gldN*, and sequences  
288 coding for FAD-binding oxidoreductase, DUF3492 domain-containing protein and a  
289 hypothetical protein (Figure 7).

290

291 On the contrary, no mutations in gliding motility genes were observed in F9 isolates exposed  
292 to FCL-2, but instead, two of these isolates had one nucleotide change in

293 DegT/DnrJ/EryC1/StrS family aminotransferase and DUF255-domain containing protein  
294 (F9R56), and cystathionine gamma-synthase (F9R61) coding genes, leading to either one  
295 amino acid change or truncated protein. No mutations were observed in no-phage control  
296 isolates. Around 2 000 620 bp (hypothetical protein coding sequence in B185 genome used as  
297 a reference), there was a poor coverage of reads leading to unclear sequence in both wild type  
298 FCO-F9, phage-exposed and no-phage control isolates, which prevented detection of possible  
299 mutations in this region.

300

## 301 **Discussion**

302

303 Phage therapy is seen as an attractive option to treat and prevent bacterial diseases, but the  
304 development of phage resistance in target bacteria is considered as one of the main problems  
305 related to the use of phages. Our results describe the selection for phage resistance in two  
306 different *F. columnare* isolates upon exposure to six specific phages. We show that phage  
307 resistance is associated with reduction in virulence and virulence-related phenotypic changes  
308 in the bacterium. Our genetic data indicate that in most cases phage resistance is caused by  
309 surface modifications, often related to the type IX secretion system connected to flavobacterial  
310 gliding motility machinery. Mutations in the genes coding for an outer membrane protein or  
311 genes related to gliding motility seem to be phage specific and likely prevent phage attachment,  
312 possibly in a phage specific manner, and lead to morphology change and loss of virulence.

313

314 In the present study, phage-exposure caused significant changes in bacterial phenotypic  
315 characteristics (motility, adhesion, protein secretion and virulence - details below) leading to  
316 phage resistance. In most isolates, these changes could be linked to changes in gliding  
317 motility-related genes. Flavobacteria show gliding motility on surfaces (29), and mutations in

318 any of the genes coding for gliding motility machinery proteins have been shown to lead to  
319 loss of motility (e.g. 30, 31). Gliding is also connected to virulence, since part of the gliding  
320 motility machinery (GldK, GldL, GldM, GldN, PorV, SprA, Spr E, SprF and SprT) is used as  
321 a type IX secretion system found in Bacteroidetes (28, 32). Indeed, phage resistance due to  
322 loss of motility has been linked with decreased virulence in *F. columnare* also previously  
323 (27), and *F. columnare gldN* mutants have been shown to exhibit both decreased proteolytic  
324 and chondroitinase activity, and virulence on rainbow trout (28). Similarly, phage resistance  
325 was associated with loss of motility and mutations in genes related to cell surface properties  
326 and gliding motility in *F. psychrophilum* (23) and in *F. johnsoniae* (31, 33). Together, the  
327 results suggest that the type IX secretion system is a key target for infection by a wide range  
328 of phages and across the Flavobacterium genus, and that mutations leading to morphology  
329 changes and loss of motility is a general response to phage exposure in this bacterial group.

330

331 Exposure to a specific phage led to different mutations in gliding motility genes in different  
332 *F. columnare* isolates, as also seen in phage-resistant *F. psychrophilum* (23), indicating that  
333 several genes are involved in phage attachment and infection of *F. columnare* phages.  
334 Furthermore, genomic analysis of one soft colony isolate revealed a large deletion (4 701 bp),  
335 spanning over two gliding motility genes. However, although all rough colony forming  
336 isolates were phage-resistant, not all these isolates (F2R62, F2R66, F2R68 and F9R58) had  
337 mutations in genes coding for proteins related to gliding motility, or elsewhere in their  
338 genome. This may indicate that development of phage resistance and colony morphology  
339 change are also influenced by gene expression or epigenetic modifications, leading to  
340 variation in colony morphology, as suggested previously (34). For example, in *Bordetella*  
341 spp, phage resistance is regulated via phase variation in virulence related factors, such as  
342 some adhesins, toxins and type III secretion system (reviewed in 35). Interestingly, isolates

343 exposed to FCL-2 did not have mutations in gliding motility related genes, suggesting that  
344 FCL-2 uses other receptors for infection of *F. columnare* than the other phages. FCL-2  
345 differs genetically from other phages infecting genetic group G bacteria (This article was  
346 submitted to an online preprint archive [36]), supporting this suggestion.

347

348 Generally, point mutations and changes in receptor expression enable a rapid and efficient  
349 response of bacterial populations to phage exposure. However, the large phenotypic costs of  
350 mutational derived phage resistance observed in *F. columnare* in this study suggest that these  
351 mutations may be dynamic and most probably also rapidly reverting back to the sensitive  
352 form in *F. columnare*. Indeed, reversion of both phage-driven and spontaneously formed  
353 rough colony types back to rhizoid has been observed to happen in *F. columnare* subcultures  
354 (27). Various mechanisms to regain phage resistance have been found also in fish pathogenic  
355 *F. psychrophilum* (23) and *V. anguillarum* (24), in which a rapid reversion back to phage-  
356 sensitive phenotype has been shown to occur. This sort of dynamics in phage resistance has  
357 also been observed in a human symbiont *Bacteroides thetaiotaomicron* (37), suggesting that  
358 the phenomenon may be common among wide variety of bacteria.

359

360 Phage-exposed *F. columnare* isolates F2R56, F2R66 and F9R58 did not respond to phage  
361 infection with surface modifications, but maintained their original rhizoid colony morphotype  
362 and high virulence. These rhizoid isolates were not completely resistant to phage, although  
363 phage infection efficiency dropped markedly (up to a million-fold decrease), suggesting some  
364 other mechanism for reducing infection efficiency. *F. columnare* has two functional CRISPR  
365 systems, which have been shown to adapt under phage exposure at fish farms (38). However,  
366 we did not observe additional CRISPR spacers in whole genome sequencing. The same was  
367 observed in phage exposed *F. psychrophilum* isolates in which no differences to the wild-

368 type strain's CRISPR composition were found (23). In our experience, CRISPR adaptation in  
369 *F. columnare* requires different experimental set-up with longer co-culture time in low  
370 nutrient medium, followed by enrichment in high-nutrient medium (This article was  
371 submitted to an online preprint archive [39]). Thus, the decreased phage sensitivity of rhizoid  
372 phage exposed isolates most probably is a consequence of yet unknown functions which need  
373 to be studied in the future.

374

375 In addition to type IX secretion system, also type I and VI secretion systems are known to  
376 function in *F. columnare* (40). Possible secretion of virulence related factors through type I  
377 and VI secretion systems in *F. columnare* could be one of the reasons why also rough phage-  
378 resistant isolates caused some mortality in fish, and explain their gelatinase and caseinase  
379 activity despite morphology change. It has also been shown recently, that virulence of *F.*  
380 *columnare* increases in the mucus and with increasing mucin concentration (17). As the mucus-  
381 covered fish surface is the main infection route of *F. columnare*, it is probable that some *F.*  
382 *columnare* virulence factors, such as proteinase activity, are expressed differently in growth  
383 media compared to the *in vivo* infection situation. This possible differential expression could  
384 also explain the mortality caused by phage-resistant rough isolates.

385

386 The ability to adhere and form biofilm has a major role in bacterial infections and in colonizing  
387 niches (41). In *F. columnare*, adhesion and biofilm forming capacity may have a central role  
388 in their persistence in the farming environment (e.g. tanks and water systems) (42), but also in  
389 establishing the first steps of infection on the fish surfaces (43). Our results indicate that *F.*  
390 *columnare* strains differ in their adherence and biofilm forming characteristics. Whereas phage  
391 exposure had no clear effect on the adhesion capacity of the F2-isolates, phage resistance led  
392 to decrease in biofilm forming capacity in most of the individual phage-resistant F2-isolates.



393 This is in agreement with the systematic reduction in biofilm forming properties of phage-  
394 resistant *F. psychrophilum* relative to the wild type (23). Adhesion capacity of F9 phage-  
395 resistant isolates, on the other hand, was significantly lower compared to the wild-type parent  
396 isolate, but rough phage-resistant F9-isolates had significantly higher biofilm forming capacity  
397 compared to rhizoid sensitive isolates. These results partly differ from what we have found  
398 earlier (25, 26), most likely because in the previous studies the rough colonies were formed  
399 spontaneously, without phage exposure. Indeed, morphology of spontaneously formed rough  
400 colonies and these morphotypes' ability to move when cultured in low-nutrient media differ  
401 from rough morphotypes formed under phage exposure (27). However, together our results  
402 indicate, that since *F. columnare* phages are genetically group-specific, they might be using  
403 different receptors, which, in turn, causes differences in bacterial resistance mechanisms  
404 between genetic groups.

405

406 *F. columnare* infections are routinely treated by antibiotics at fish farms. In this study, phage  
407 resistance did not affect the antibiotic susceptibility of any of the isolates studied. Lack of  
408 association between development of antibiotic resistance and bacteriophage resistance has also  
409 been shown e.g. in *Escherichia coli* (44). Based on our results, phage resistance does not  
410 increase a risk of antibiotic resistance development, and thus, phage-therapy given as a cure or  
411 prophylactic treatment at fish farms most probably does not rule out the possible concomitant  
412 use of antibiotics as therapeutic agents against columnaris infections. Indeed, it was shown by  
413 using *P. fluorescens* as a model bacterium, that applying phages together with antibiotic  
414 treatments may inhibit the evolution of antibiotic resistance in pathogenic bacteria (45).

415

416 To summarize, our results show, that even though *F. columnare* rapidly develops phage  
417 resistance under phage exposure, the arise of phage resistance does not pose a high risk for a

418 development of phage therapy against columnaris infections in rainbow trout. This is because  
419 phage resistance leads to decrease in bacterial virulence, adherence to surfaces and protease  
420 secretion. Based on our results with experiments with two genetically different wild-type  
421 bacterial isolates, development and regulation of phage resistance in *F. columnare* is a  
422 multifactorial process, partly affected by formation of mutations mainly in gliding motility and  
423 type IX secretion system related genes, and partly by other defence mechanisms against  
424 phages, the function of which needs to be studied in the future.

425

## 426 **Materials and methods**

427

### 428 *Bacterial and phage isolates*

429

430 Bacteria and phages used in this study were isolated from water samples collected from fish  
431 farms during columnaris outbreaks (This article was submitted to an online preprint archive  
432 [36]) (Table 1). Bacteria were confirmed as *F. columnare* by restriction fragment length  
433 polymorphism (RFLP) analysis of 16S rRNA gene and classified into genetic groups by RFLP  
434 of 16S-23S internal transcribed spacer (ITS) region (This article was submitted to an online  
435 preprint archive [36]). All the six phages belong to the *Myoviridae* family and have been  
436 characterised with respect to host range and genomic composition (This article was submitted  
437 to an online preprint archive [36]).

438

### 439 *Bacterial cultures and phage lysates*

440

441 For phage exposure and virulence test, *F. columnare* isolates were inoculated from  
442 cryopreserved (−80°C) stocks in modified Shieh-medium (46) and grown for 48 h at 25°C with

443 120 rpm agitation. After this, subcultures were made in modified Shieh-medium and grown for  
444 24 h at 25°C with 120 rpm agitation. The optical density (OD) of the bacterial broth  
445 suspensions was measured spectrophotometrically at 595 nm and adjusted to  $5 \times 10^5$  colony  
446 forming units (CFU) mL<sup>-1</sup> for phage exposures and  $5 \times 10^6$  CFU mL<sup>-1</sup> for virulence experiment  
447 (based on previously determined OD/CFU relationship). For other test, *F. columnare* isolates  
448 were cultured in TYES broth (47), washed in TYES broth by centrifugation at 5310 X g for 15  
449 min at 4°C, and cultures spectrophotometrically adjusted to OD 0.6 at 520 nm (approximately  
450  $10^8$  CFU mL<sup>-1</sup>).

451

452 Phage lysates were produced using “double layer agar” -method (48) as follows: Three mL of  
453 melted (47°C) top agar (0.5%) including 300 µL of 24-hour subculture of the host bacterium  
454 and 100 µL of phage (tenfold dilutions in Shieh medium) was poured on Shieh agar and grown  
455 for 48 h at 25 °C. Five mL of Shieh-medium was added on top of Shieh agar plates with  
456 confluent lysis and incubated at 7°C for 12-18 h in constant agitation (90 rpm). The lysates  
457 were collected, filtered (PES membrane, pore size 0.45 µm, Nalgene®), and stored at +7°C or  
458 at -80°C with 20 % glycerol. For phage exposure, phage lysates were diluted with Shieh  
459 medium to  $5 \times 10^5$  plaque forming units (PFU) mL<sup>-1</sup>.

460

461 *Phage exposure experiments and isolation of colonies*

462

463 Two phage-sensitive wild-type *F. columnare* isolates, the high-virulence FCO-F2 isolate  
464 (genetic group C) and the medium-virulence FCO-F9 isolate (genetic group G) (This article  
465 was submitted to an online preprint archive [36]), were each exposed to three phages in separate  
466 experiments with individual phages. Isolate FCO-F2 was exposed to phages FCOV-F2, FCOV-  
467 F5 and FCOV-F25, and isolate FCO-F9 to phages FCL-2, FCOV-F13 and FCOV-F45, in

468 accordance with the host range of the phages. Cultures with only bacteria served as no-phage  
469 controls. The exposures were carried out in 20 mL of autoclaved fresh water (Lake Jyväsjärvi)  
470 in triplicate cultures under constant agitation (120 rpm) at 25°C for three days at a multiplicity  
471 of infection (MOI) at inoculation of 1 ( $1 \times 10^4$  CFU and PFU mL<sup>-1</sup>). The cultures were sampled  
472 every 24h for three days, by making a serial tenfold dilution of samples, and spreading on  
473 Shieh-agar plates. After up to 4 days of incubation at room temperature, CFUs and colony  
474 morphologies were determined from the plate cultures. Two to three colonies from each  
475 triplicate culture at each sampling point were picked, and pure-cultured directly on Shieh agar  
476 plates three times to get rid of any phage contamination. Colonies were then checked for phage  
477 resistance by spot assay on agar plates: bacterial laws on top agar were prepared as above and  
478 10 µL of ten-fold diluted original phage lysates (used in initial exposures) were spotted on agar.  
479 After 48-h incubation at 25 °C, bacterial plates with no observed plaques or confluent lysis  
480 were considered as phage-resistant. Altogether 189 colonies from phage-exposed and no-phage  
481 control exposures were isolated from plate cultures. From this collection, 20 phage-exposed  
482 and 4 no-phage control isolates were selected for further analysis (Table 2).

483

484 The phage-exposed and no-phage control isolates were named according to the latter part of  
485 the wild-type bacterial host, a letter R for phage-exposed and S for no-phage control isolate,  
486 plus a running number for the isolated colony. For example, F2R2 is the second selected phage-  
487 exposed colony of the *F. columnare* wild-type isolate FCO-F2. Correspondingly, the second  
488 *F. columnare* isolate from no-phage control cultures was marked as F2S2. For simplicity, wild-  
489 type FCO-F2 and all its subsequent isolates from the phage and control exposures are  
490 commonly called F2-isolates in this paper. Correspondingly, wild-type FCO-F9 and its  
491 subsequent isolates are called F9-isolates.

492

493 *Antibiotic sensitivity*

494

495 Changes in susceptibility of phage-exposed *F. columnare* isolates towards antibiotics was  
496 tested using the Kirby-Bauer disc diffusion method (49) on diluted Mueller-Hinton (50) agar  
497 medium supplemented with 5 % w/v fetal calf serum. A 40  $\mu$ L volume of each isolate  
498 suspension ( $10^9$  CFU mL<sup>-1</sup>) was added to 5 mL phosphate-buffered saline and poured onto the  
499 Mueller-Hinton agar plates. After removing excess bacterial suspension by pipetting, the  
500 antibiotic discs [oxolinic acid (2  $\mu$ g), florfenicol (30  $\mu$ g), sulfamethoxazol/trimethoprim (25  
501  $\mu$ g) and tetracycline (30  $\mu$ g)] were placed on the plates. The plates were then incubated for 3  
502 days at 25°C. After incubation, the inhibition zone around the antibiotic discs was measured.  
503 The susceptibility patterns of the selected phage-exposed and no-phage control *F. columnare*  
504 isolates to the antibiotics were compared to that of the parent wild-type isolates.

505

506 *Motility/Colony spreading*

507

508 The effect of phage-exposure on bacterial motility was tested by comparing the colony  
509 spreading ability of phage-exposed and no-phage control isolates with that of their parent wild-  
510 type isolates. After spotting of 5  $\mu$ L of bacterial suspension ( $10^9$  CFU mL<sup>-1</sup>) on TYES agar  
511 (0.5% agar) plates supplemented with 0.1% baker's yeast and incubation for 3 days at 25°C,  
512 the colony diameter of each isolate was measured. Each isolate was tested in three replicates.

513

514 *Adhesion and biofilm formation*

515

516 Changes in adherence or biofilm formation capacities between wild-type, phage-exposed and  
517 no-phage control *F. columnare* isolates were studied in flat-bottomed 96-well microtiter plates

518 (Nunclon  $\Delta$  Surface, Nunc) (51). *F. columnare* cells grown on TYES agar were suspended in  
519 autoclaved fresh water (lake Littoistenjärvi) to a concentration of  $10^8$  CFU mL<sup>-1</sup> (OD<sub>520nm</sub>=0.6).  
520 For testing of bacterial adherence, a 100  $\mu$ L volume of the prepared bacterial suspensions were  
521 added in triplicate into wells of replicate microtiter plates and incubated statically for 1 h at  
522 25°C. For testing of biofilm formation, a 100  $\mu$ L volume of TYES broth was added to wells  
523 containing 100  $\mu$ L of the prepared bacterial suspensions and allowed to incubate for 3 days.  
524 Autoclaved fresh water was used as negative control. After incubation, the contents were  
525 discarded and the wells were washed three times with sterile 0.5% NaCl to remove non-  
526 adherent cells and air dried. The wells were then stained with 0.1% crystal violet solution for  
527 45 min and washed three times by submersion in a container of tap water and air dried. The  
528 crystal violet was solubilized with 96% ethanol for 15 min before measuring the absorbance (1  
529 s) at 595 nm (Victor2, Wallac).

530

### 531 *Protease activity*

532

533 Changes in protease activity was examined by spotting 1  $\mu$ L of bacterial TYES broth  
534 suspension ( $10^8$  CFU mL<sup>-1</sup>) of the wild-type isolates and each phage-exposed and no-phage  
535 control isolate on TYES agar (1.5% agar) supplemented with (w/v) elastin (0.1%), gelatin (3%)  
536 and skim milk (5%) (caseinase production). The proteolytic activity of each isolate was  
537 observed by the presence of a clear zone surrounding the colony after incubation, and assessed  
538 by measuring the clear zone ratio (diameter of clear zone/diameter of the colony) of three  
539 replicate samples. In the absence of a clearing zone outside the colony, the clear zone ratio was  
540 defined as 1. The measurements were made after 5 (caseinase and gelatinase) or 10 days  
541 (elastinase) of incubation at 25°C.

542

543 *Virulence*

544

545 Virulence of phage-exposed and no-phage control *F. columnare* isolates was tested on 1.94 g  
546 (average weight) rainbow trout fry and compared to the virulence of wild-type isolates. Fifteen  
547 fish per treatment, 20 in control treatment with no bacteria, were exposed individually in 500  
548 mL of bore hole water (25°C) to cells of single bacterial isolates by constant immersion (5.0 X  
549 10<sup>3</sup> CFU mL<sup>-1</sup>). Survival of the fish was monitored hourly during 24 h. Morbid fish that did  
550 not respond to stimuli were considered dead, removed from the experiment and put down by  
551 decapitation. At the end of the experiment, the fish having survived from the infection were  
552 put down using 0.008 % Benzocaine. Bacterial cultivations from gills of all the dead fish were  
553 made on Shieh agar supplemented with tobramycin (52) to confirm the presence/absence of  
554 the bacterium. Cumulative percent mortality and estimated survival time (Kaplan-Meier  
555 Survival Analysis), based on observed average survival time of fish after exposure to each  
556 isolate, were used as measures of virulence with more virulent isolates having a shorter  
557 estimated survival time.

558

559 Fish experiment was conducted according to the Finnish Act of Use of Animals for  
560 Experimental purposes, under permission ESAVI/8187/2018 granted for Lotta-Riina Sundberg  
561 by the National Animal Experiment Board at the Regional State Administrative Agency for  
562 Southern Finland.

563

564 *Whole genome sequencing*

565

566 Genomes of the wild-type FCO-F2 and FCO-F9 *F. columnare* and selected (Table 2) 20 phage-  
567 exposed and four no-phage control isolates were sequenced using Illumina HiSeq platform

568 (Institute of Molecular Medicine Finland). The Illumina data reads of FCO-F9 and its phage-  
569 exposed and no-phage control isolates were mapped to a reference genome of *F. columnare*  
570 isolate B185 (53) using Geneious software version 11.1.5 (Biomatters Ltd.). Genome of the  
571 wild-type FCO-F2 isolate was sequenced also using PacBio (BGI, China). PacBio data of FCO-  
572 F2 was assembled using > 8kbp reads with Flye (v. 2.7, four iterations) and > 6 kbp with Canu  
573 (v. 1.9). These multi-contig assemblies were then combined using Quickmerge (v. 0.3) to  
574 produce one 3 221 312 bp contig. This contig was polished with Illumina HiSeq reads using  
575 Pilon (v. 1.23), with pre-processing done using Trimmomatic (v. 0.39), bowtie2 (2.3.5.1) and  
576 Samtools (v. 1.9). The quality of the polished contig was quantified using Busco (v. 4.0.2),  
577 which reported 100% completeness of genome against the bacteria\_odb10 reference set. The  
578 genome was annotated using the NCBI Prokaryotic Genome Annotation Pipeline (PGAP) (54,  
579 55), and used as reference genome for mapping of F2 phage-exposed and no-phage control  
580 isolates.

581

### 582 *Statistical analyses*

583

584 IBM SPSS Statistics version 24 was used for statistical analysis of the data. A one-way analysis  
585 of variance (ANOVA) was used to compare means from phenotypic analyses between  
586 experimental groups (phage-exposed isolates and no-phage control isolates) and parent wild-  
587 type isolates. If needed, lg10, exponential or square root transformations were made for the  
588 data to fulfil the homogeneity of variances assumption. If the homogeneity of variances could  
589 not be met by transformations, the data were analysed using non-parametric Kruskal-Wallis  
590 and Mann-Whitney tests. In case of elastinase and casienase activity, and biofilm formation,  
591 the isolates with no activity/biofilm forming capacity were excluded from the ANOVA LSD



592 multiple comparison analyses. Kaplan-Meier Survival Analysis was used for analysis of  
593 virulence data.

594

595 *Data availability*

596

597 The whole genome sequences of all the isolates were submitted to GenBank under accession  
598 numbers presented in Table 3.

599

## 600 **Acknowledgements**

601

602 We acknowledge funding from Academy of Finland (grant #314939) and Jane and Aatos Erkko  
603 Foundation. This work resulted from the BONUS FLAVOPHAGE project supported by  
604 BONUS (Art 185), funded jointly by the EU and Academy of Finland.

605

## 606 **References**

607

- 608 1. Cabello FC, Godfrey HP, Tomova A, Ivanova L, Dölz H, Millanao A, Buschmann  
609 AH. 2013. Antimicrobial use in aquaculture re-examined: its relevance to  
610 antimicrobial resistance and to animal and human health. *Environ Microbiol* 15:1917–  
611 1942.
- 612 2. Watts JEM, Schreier HJ, Lanska L, Hale MS. 2017. The rising tide of antimicrobial  
613 resistance in aquaculture: sources, sinks and solutions. *Mar Drugs* 15:158.
- 614 3. Gudding R, Lillehaug A, Evensen Ø (ed). 2014. Fish vaccination. Wiley Blackwell,  
615 UK.

- 616 4. Suomalainen LR, Tirola MA, Valtonen ET. 2005. Effect of *Pseudomonas* sp. MT5  
617 baths on *Flavobacterium columnare* infection of rainbow trout and on microbial  
618 diversity on fish skin and gills. *Dis Aquat Org* 63:61–68.
- 619 5. Pulkkinen K, Suomalainen LR, Rintamäki-Kinnunen P, Read A, Ebert D, Valtonen ET.  
620 2010. Intensive fish farming and the evolution of pathogen virulence: the case of  
621 columnaris disease in Finland. *Proc Royal Soc B* 277:593-600.
- 622 6. Schmidt AS, Bruun MS, Dalsgaard I, Pedersen K, Larsen JL. 2000. Occurrence of  
623 antimicrobial resistance in fish-pathogenic and environmental bacteria associated with  
624 four danish rainbow trout farms. *Appl Environ Microbiol* 66:4908-4915.
- 625 7. Hesami S, Parkman J, MacInnes JI, Gray JT, Gyles CL, Lumsden JS. 2010.  
626 Antimicrobial susceptibility of *Flavobacterium psychrophilum* Isolates from Ontario. *J*  
627 *Aquat Anim Health* 22:39–49.
- 628 8. Molina-Aja A, García-Gasca A, Abreu-Grobois A, Bolán-Mejía C, Roque A, Gomez-  
629 Gil B. 2002. Plasmid profiling and antibiotic resistance of *Vibrio* strains isolated from  
630 cultured penaeid shrimp. *FEMS Microbiol Lett* 213:7-12.
- 631 9. Mohamad N, Amal MNA, Saad MZ, Yasin ISM, Zulkipli NA, Mustafa M,  
632 Nasruddin NS. 2019. Virulence-associated genes and antibiotic resistance patterns of  
633 *Vibrio* spp. isolated from cultured marine fishes in Malaysia. *BMC Vet Res* 15:176.
- 634 10. Declercq AM, Boyen E, Van den Broeck W, Bossier P, Karsi A, Haeseborouck F,  
635 Decostere A (2013). Antibiotic susceptibility pattern of *Flavobacterium columnare*  
636 isolates collected worldwide from 17 fish species. *J Fish Dis* 3:45-55.
- 637 11. Loc-Carrillo C, Abedon ST. 2011. Pros and cons of phage therapy. *Bacteriophage*  
638 1:111-114.

- 639 12. Nakai T, Sugimoto R, Park KH, Matsuoka S, Mori K, Nishioka T, Maruyama K. 1999.  
640 Protective effects of bacteriophage on experimental *Lactococcus garviae* infection in  
641 yellowtail. *Dis Aquat Org* 37:33-41.
- 642 13. Park SC, Nakai T. 2003. Bacteriophage control of *Pseudomonas plecoglossicida*  
643 infection in ayu *Plecoglossus altivelis*. *Dis Aquat Org* 53:33-39.
- 644 14. Higuera G, Bastías R, Tsersvadze G, Romero J, Espejo RT. 2013. Recently discovered  
645 *Vibrio anguillarum* phages can protect against experimentally induced vibriosis in  
646 Atlantic salmon, *Salmo salar*. *Aquaculture* 392-395:128-130.
- 647 15. Castillo D, Higuera G, Villa M, Middelboe M, Dalsgaard I, Madsen L, Espejo RT.  
648 2012. Diversity of *Flavobacterium psychrophilum* and the potential use of its phages  
649 for protection against bacterial cold-water disease in salmonids. *J Fish Dis* 35:193-201.
- 650 16. Laanto E, Bamford JKH, Ravantti J, Sundberg L-R. 2015. The use of phage FCL-2 as  
651 an alternative to chemotherapy against columnaris disease in aquaculture. *Front*  
652 *Microbiol* 6:829.
- 653 17. Almeida GMF, Laanto E, Ashrafi R, Sundberg LR. 2019. Bacteriophage adherence to  
654 mucus mediates preventive protection against pathogenic bacteria. *mBio* 10:e01984-  
655 19.
- 656 18. Tan D, Svenningsen SL, Middelboe M. 2015. Quorum sensing determines the choice  
657 of anti-phage defense strategy in *Vibrio anguillarum*. *mBIO* 6:00627-15
- 658 19. Azam AH, Tanji Y. 2019. Bacteriophage-host arm race: an update on the mechanism  
659 of phage resistance in bacteria and revenge of the phage with the perspective for phage  
660 therapy. *Appl Microbiol Biotechnol* 103:2121-2131.
- 661 20. Cohen D, Melamed S, Millman A, Shulman G, Oppenheimer-Shaanan Y, Kacen A,  
662 Doron S, Amitai G, Sorek R. 2019. Cyclic GMP–AMP signalling protects bacteria  
663 against viral infection. *Nature* 574:691-695.

- 664 21. Léon M, Bastias R. 2015. Virulence reduction in bacteriophage resistant bacteria. Front  
665 Microbiol 6:343.
- 666 22. Park SC, Shimamura I, Fukunaga M, Mori KI, Nakai T. 2000. Isolation of  
667 bacteriophages specific for a fish pathogen, *Pseudomonas plecoglossicida*, as a  
668 candidate for disease control. Appl Environ Microbiol 66:1416-1422.
- 669 23. Castillo D, Christiansen RH, Dalsgaard I, Madsen L, Middelboe M. 2015.  
670 Bacteriophage resistance mechanisms in the fish pathogen *Flavobacterium*  
671 *psychrophilum*: Linking genomic mutations to changes in bacterial virulence factors.  
672 Appl Environ Microbiol 18:1157-1167.
- 673 24. Castillo D, Rørbo N, Jørgensen J, Lange J, Tan D, Kalatzis PG, Lo Svenningsen S,  
674 Middelboe M. 2019. Phage defence mechanisms and their genomic and phenotypic  
675 implications in the fish pathogen *Vibrio Anguillarum*. FEMS Microbiol Ecol 95:fiz004
- 676 25. Kunttu HMT, Suomalainen LR, Jokinen EI, Valtonen ET. 2009. *Flavobacterium*  
677 *columnare* colony types: Connection to adhesion and virulence? Microb Pathog 46: 21-  
678 27.
- 679 26. Kunttu HMT, Jokinen EI, Sundberg L-R, Valtonen ET. 2011. Virulent and nonvirulent  
680 *Flavobacterium columnare* colony morphologies: Characterization of chondroitin AC  
681 lyase activity and adhesion to polystyrene. J Appl Microbiol 111:1319-1326.
- 682 27. Laanto E, Bamford JKH, Laakso J, Sundberg LR. 2012. Phage driven loss of virulence  
683 in a fish pathogenic bacterium. PLOS ONE 7:e53157.
- 684 28. Li N, Zhu Y, LaFrentz BR, Evenhuis JP, Hunnicut DW, Conrad RA, Barbier P,  
685 Gullstrand GW, Roets JE, Powers JL, Kulkarni SS, Erbes DH, Garcia JC, Nie P,  
686 McBride MJ. 2017. The Type IX secretion system is required for virulence of the fish  
687 pathogen *Flavobacterium columnare*. Appl Environ Microbiol 83:e017769-17.

- 688 29. McBride MJ, Nakane D. 2015. *Flavobacterium* gliding motility and the type IX  
689 secretion system. *Curr Opin Microbiol* 28:72-77.
- 690 30. Braun TF, Khubbar MK, Saffarini DA, McBride MJ. 2005. *Flavobacterium*  
691 *johnsoniae* gliding motility genes identified by mariner mutagenesis. *J Bacteriol*  
692 187:6943-6952.
- 693 31. Shrivastava A, Johnston JJ, van Baaren JM, McBride MJ. 2013. *Flavobacterium*  
694 *johnsoniae* GldK, GldL, GldM, and SprA are required for secretion of the cell surface  
695 gliding motility adhesins SprB and RemA. *J Bacteriol* 195:3201-3212.
- 696 32. Johnston JJ, Shrivastava A, McBride MJ. 2018. Untangling *Flavobacterium*  
697 *johnsoniae* gliding motility and protein secretion. *J Bacteriol* 200:e00362-17.
- 698 33. Hunnicutt DW, Kempf MJ, McBride MJ. 2002. Mutations in *Flavobacterium*  
699 *johnsoniae* *gldF* and *gldG* disrupt gliding motility and interfere with membrane  
700 localization of GldA. *J Bacteriol* 184:2370-2378.
- 701 34. Penttinen R, Hoikkala V, Sundberg LR. 2018. Gliding motility and expression of  
702 motility related genes in spreading and non-spreading colonies of *Flavobacterium*  
703 *columnare*. *Front Microbiol* 9:525.
- 704 35. Labrie S, Samson JE, Moineau S. 2010. Bacteriophage resistance mechanisms. *Nat*  
705 *Rev Microbiol* 8:317-327.
- 706 36. Runtuvuori-Salmela A, Kunttu HMT, Laanto E, Almeida GMF, Mäkelä K,  
707 Middelboe M, Sundberg LR. (2020). Prevalence of genetically similar  
708 *Flavobacterium columnare* phages across aquaculture environments reveals a strong  
709 potential for pathogen control. *bioRxiv*  
710 <https://biorxiv.org/cgi/content/short/2020.09.23.309583v1>
- 711 37. Porter NT, Hryckowian AJ, Merrill BD, Fuentes JJ, Gardner JO, Glowacki RWP,  
712 Singh S, Crawford RD, Snitkin ES, Sonnenburg JL, Martens EC. 2020. Phase-

- 713 variable capsular polysaccharides modify bacteriophage susceptibility in *Bacteroides*  
714 *thetaiotaomicron*. Nat Microbiol 5:1170-1181.
- 715 38. Laanto E, Hoikkala V, Ravantti J, Sundberg LR. 2017. Long-term coevolution of host-  
716 parasite interaction in the natural environment. Nat Commun 8:111.
- 717 39. Hoikkala V, Ravantti J, Díez-Villaseñor C, Tirola M, Conrad RA, McBride MJ,  
718 Sundberg LR. 2020. Cooperation between CRISPR-Cas types enables adaptation in  
719 an RNA-targeting system. bioRxiv <https://doi.org/10.1101/2020.02.20.957498>
- 720 40. Kumru S, Tekedar HC, Gulsoy N, Waldbieser GC, Lawrence ML, Karsi A. 2017.  
721 Comparative analysis of the *Flavobacterium columnare* Genomovar I and II genomes.  
722 Front Microbiol 8:1375.
- 723 41. Flemming HC, Wingender J, Szewzyk U, Steinberg P, Rice SA, Kjelleberg S. 2016.  
724 Biofilms: an emergent form of bacterial life. Nat Rev 14:563.
- 725 42. Cai W, De La Fuente L, Arias CR. (2013). Biofilm formation by the fish pathogen  
726 *Flavobacterium columnare*: Development and parameters affecting surface  
727 attachment. Appl Environ Microbiol 79:5633-5642.
- 728 43. Decostere A, Haesebrouck F, Turnbull JF, Charlier G. (1999). Influence of water  
729 quality and temperature on adhesion of high and low virulence *Flavobacterium*  
730 *columnare* strains to isolated gill arches. J Fish Dis 22:1-11.
- 731 44. Allen RC, Pfrunder-Cardozo KR, Meinel D, Egli A, Hall AR. 2017. Associations  
732 among antibiotic and phage resistance phenotypes in natural and clinical *Escherichia*  
733 *coli* isolates. mBio 8:e01341-17.
- 734 45. Zhang QG, Buckling A. 2012. Phages limit the evolution of bacterial antibiotic  
735 resistance in experimental microcosms. Evol Appl 5:575-582.
- 736 46. Song YL, Fryer JL, Rohovec JS. 1988. Comparison of six media for the cultivation of  
737 *Flexibacter columnaris*. Fish Pathol 23:91-94.

- 738 47. Holt RA, Rohovec JS, Fryer JL. 1993. Bacterial cold-water disease, p 3-23. *In* Inglis  
739 V, Roberts RJ, Bromage NR (ed), *Bacterial Diseases of Fish*. Blackwell Scientific  
740 Publication Oxford, UK.
- 741 48. Adams MH. 1959. *Bacteriophages*. Interscience Publishers, Inc., New York.
- 742 49. Bauer AW, Kirby WMM, Sherris JC, Turck M. 1966. Antibiotic Susceptibility testing  
743 by a standardized single disk method. *Am J Clin Pathol* 45:493–496
- 744 50. CLSI. 2006. Methods for antimicrobial disk susceptibility testing of bacteria isolated  
745 from aquatic animals; Approved guideline. CLSI document M42-A. Wayne, PA:  
746 Clinical and Laboratory Standards Institute.
- 747 51. Högfors-Rönholm E, Norrgård J, Wiklund T. 2015. Adhesion of smooth and rough  
748 phenotypes of *Flavobacterium psychrophilum* to polystyrene surfaces. *J Fish Dis*  
749 38:429–437.
- 750 52. Decostere A, Haeseborouck F, Devriese LA. 1997. Shieh medium supplemented with  
751 tobramycin for selective isolation of *Flavobacterium columnare* (*Flexibacter*  
752 *columnaris*) from diseased fish. *J Clin Microbiol* 35:322-324.
- 753 53. Ravantti JJ, Laanto E, Papponen P, Sundberg LR. 2019. Complete genome sequence of  
754 fish pathogen *Flavobacterium columnare* strain B185, originating from Finland.  
755 *Microbiol Resour Announc* 8:e01285-19.
- 756 54. Tatusova T, DiCuccio M, Badretdin A, Chetvernin V, Nawrocki EP, Zaslavsky L,  
757 Lomsadze A, Pruitt KD, Borodovsky M, Ostell J. 2016. NCBI prokaryotic genome  
758 annotation pipeline. *Nucleic Acids Res* 44:6614-24.
- 759 55. Haft DH, DiCuccio M, Badretdin A, Brover V, Chetvernin V, O'Neill K, Li W,  
760 Chitsaz F, Derbyshire MK, Gonzales NR, Gwadz M, Lu F, Marchler GH, Song JS,  
761 Thanki N, Yamashita RA, Zheng C, Thibaud-Nissen F, Geer LY, Marchler-Bauer A,

762 Pruitt KD. 2018. RefSeq: an update on prokaryotic genome annotation and curation.

763 Nucleic Acids Res 46(D1):D851-D860.

764



765 **Figures**

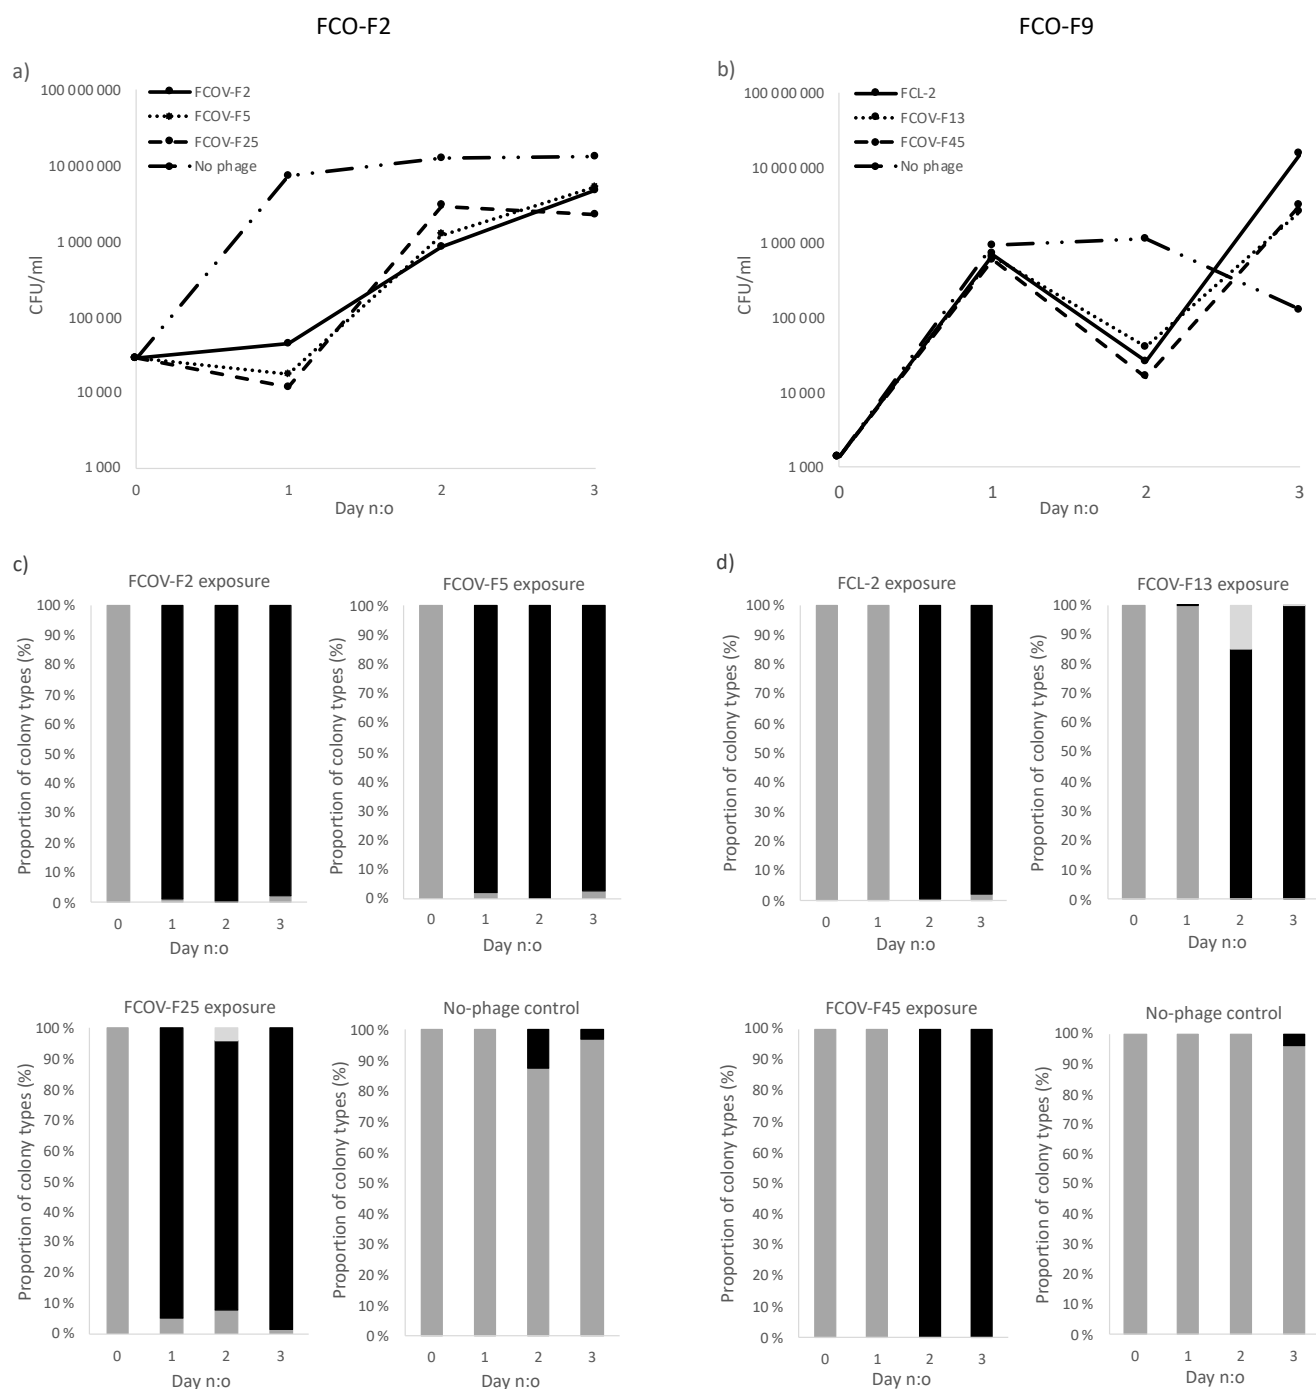

766  
 767 **Figure 1.** Bacterial growth (a and b), determined as colony forming units mL<sup>-1</sup>, and  
 768 proportion (%) of different colony types (c and d) of *Flavobacterium columnare* isolates  
 769 FCOV-F2 (a and c) and FCOV-F9 (b and d) during the 3-day exposure to phages FCOV-F2,  
 770 FCOV-F5, FCOV-F25, FCL-2, FCOV-F13 and FCOV-F45. Dark grey bar: proportion of  
 771 isolates forming rhizoid colony morphology, black bar: proportion of isolates forming rough  
 772 colony morphology, light grey bar: proportion of isolates forming soft colony morphology.

773  
774  
775  
776  
777  
778  
779  
780  
781  
782  
783  
784  
785  
786  
787  
788  
789  
790  
791  
792  
793  
794  
795

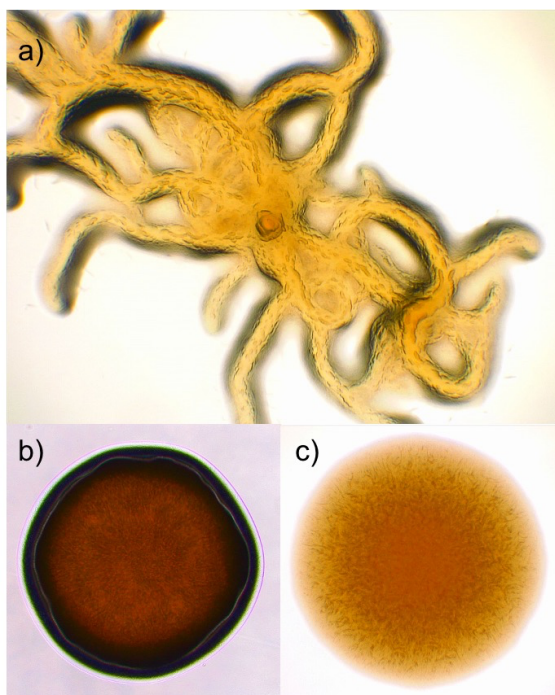

**Figure 2.** Different colony morphologies formed by *Flavobacterium columnare* on Shieh-agar plates after phage exposure: a) rhizoid, b) rough and c) soft.

796  
797  
798  
799  
800  
801  
802  
803  
804  
805  
806  
807  
808  
809  
810  
811  
812  
813  
814  
815  
816  
817  
818

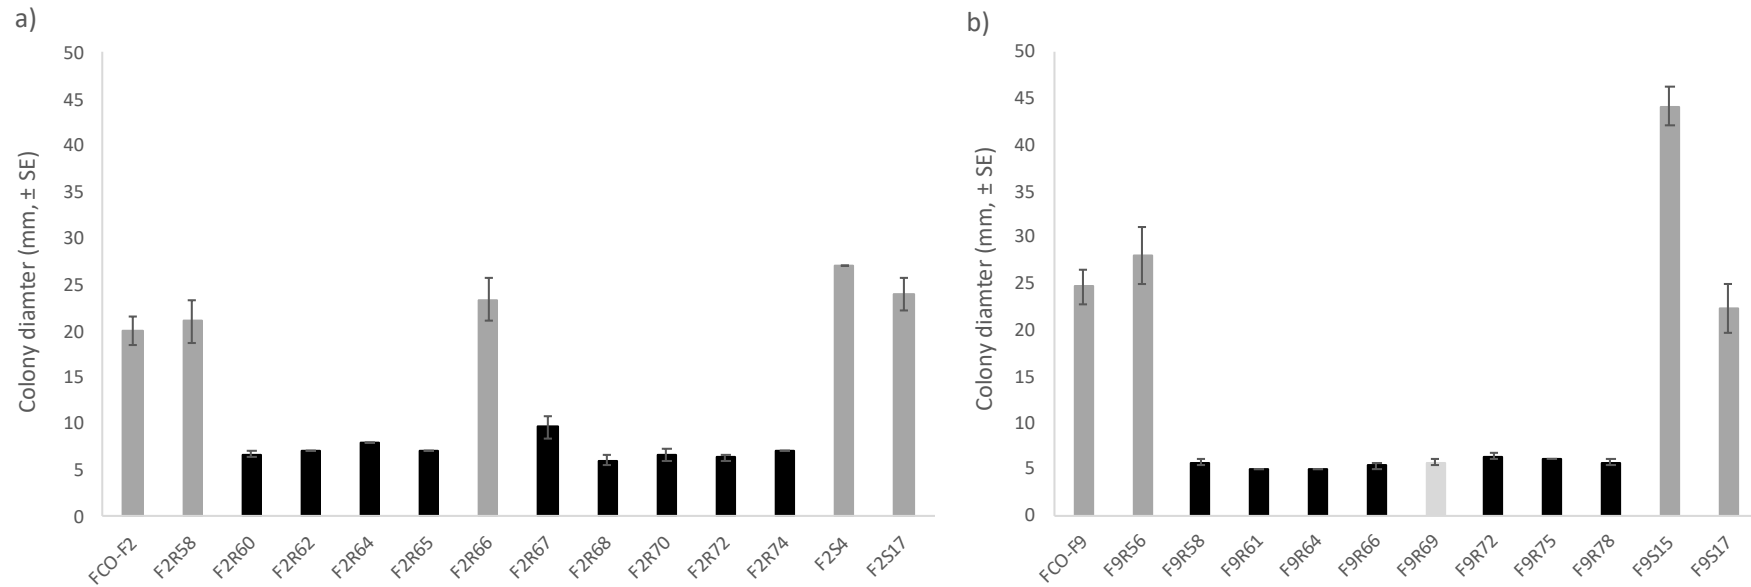

**Figure 3.** Motility of *Flavobacterium columnare* wild-type a) FCO-F2 and b) FCO-F9 isolates, and their phage-exposed (F2R- and F9R-) and no-phage control (F2S- and F9S-) isolates expressed as colony diameter (mm, ±SE) on TYES agar. All the phage-sensitive rhizoid colonies forming isolates (dark grey bar) were significantly more motile than phage-resistant rough (black bar) or soft (light grey bar) morphology isolates (F2-isolates:  $P < 0.001$ , Oneway ANOVA, LG10 transformation; F9-isolates:  $P \leq 0.004$ , Mann-Whitney test).

819  
820  
821  
822  
823  
824  
825  
826  
827  
828  
829  
830  
831  
832  
833  
834  
835  
836  
837  
838  
839  
840  
841  
842  
843  
844  
845  
846  
847  
848  
849  
850  
851  
852  
853  
854  
855  
856  
857  
858  
859  
860  
861  
862  
863

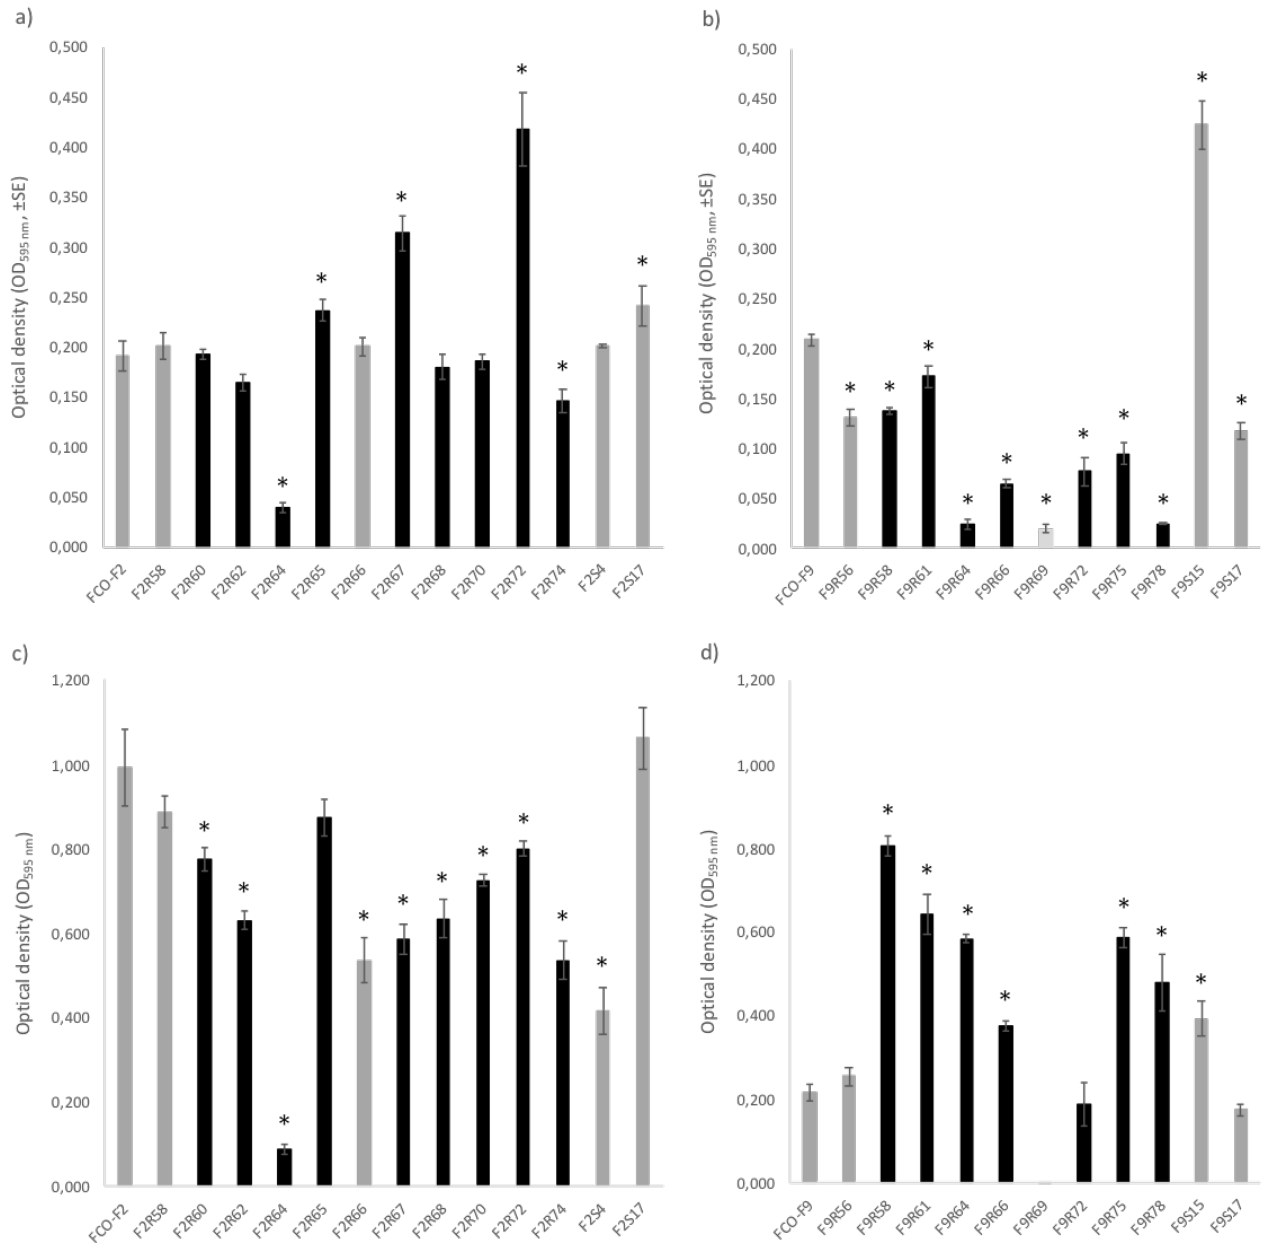

**Figure 4.** Adherence (a and b) and biofilm forming (c and d) capacity of *Flavobacterium columnare* wild-type FCO-F2 (a and c) and FCO-F9 (b and d) isolates, and their phage-exposed (F2R- and F9R-) and no-phage control (F2S- and F9S-) isolates on a polystyrene surface measured as optical density (OD<sub>595 nm</sub>, ±SE). Asterisks indicate the statistically significant difference ( $P < 0.05$ ) compared to the parent wild-type isolate. F9S69 did not form any biofilm and was thus excluded from the statistical analyses. Dark grey bars: phage-sensitive isolates forming rhizoid colony morphology, black bars: phage-resistant isolates forming rough morphology, light grey bar: phage-resistant isolate forming soft morphology.

864  
865  
866  
867  
868  
869  
870  
871  
872  
873  
874  
875  
876  
877  
878  
879  
880  
881  
882  
883  
884  
885  
886  
887  
888  
889  
890  
891  
892  
893  
894  
895  
896  
897  
898  
899  
900  
901  
902  
903  
904  
905  
906  
907  
908

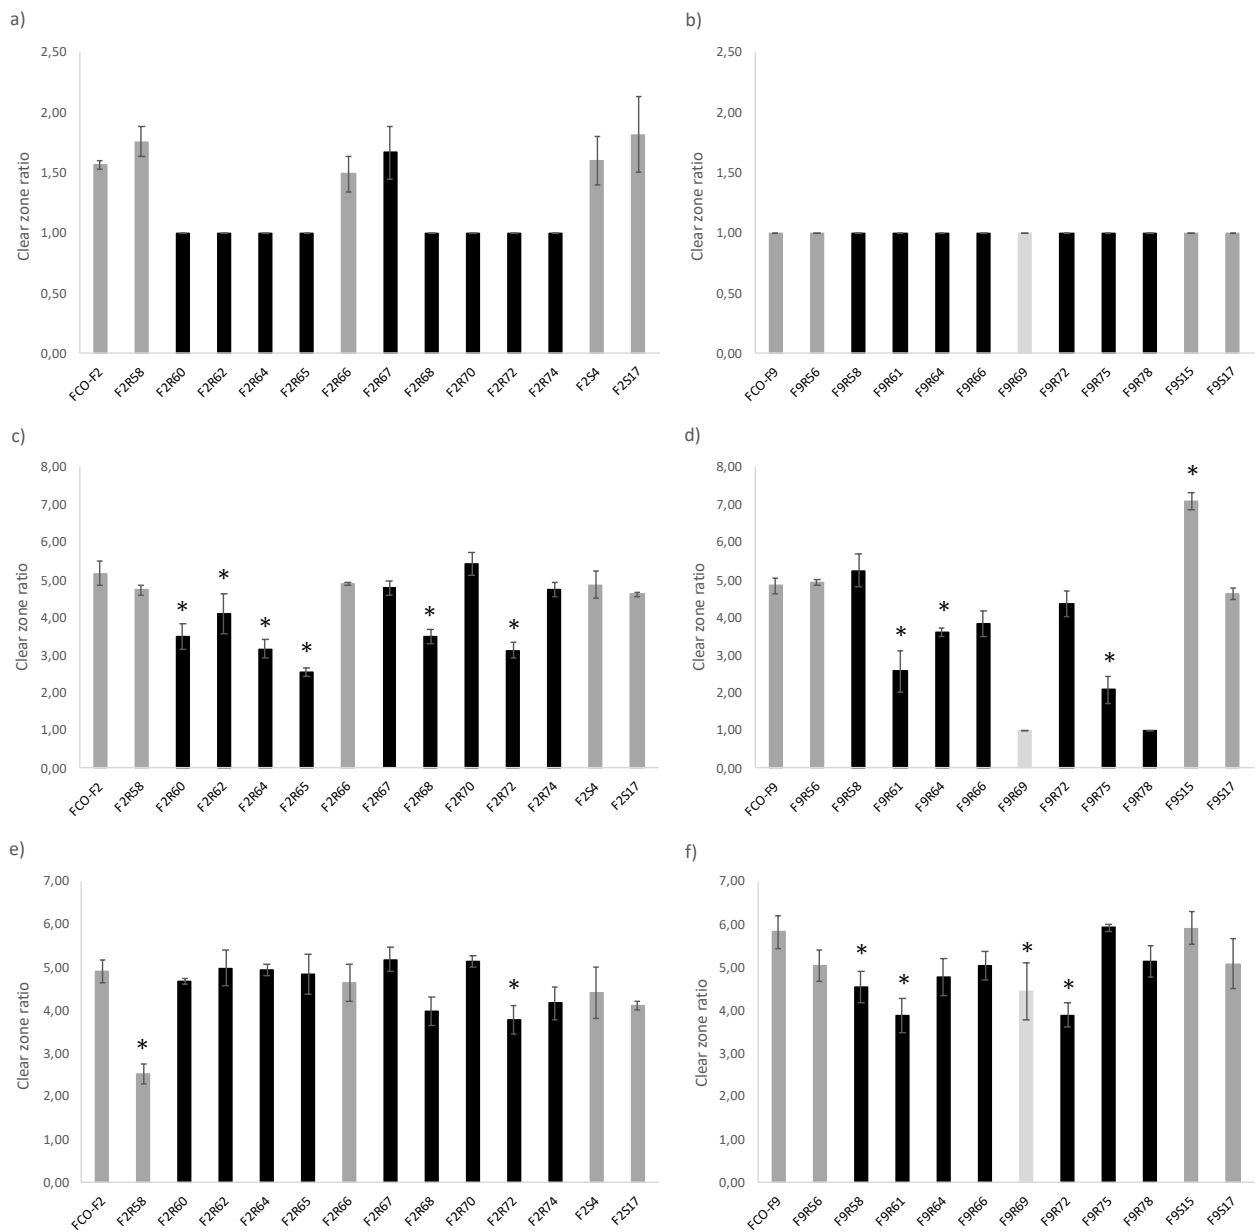

**Figure 5.** Protease (elastinase: a and b, gelatinase: c and d, and caseinase e and f) activity of the *Flavobacterium columnare* FCO-F2 (a, c and e) and FCO-F9 (b, d and f) isolates, and their phage-exposed (F2R- and F9R-) and no-phage control (F2S- and F9S-) isolates. The activity was measured as the clear zone ratio (clear zone diameter/colony diameter,  $\pm$ SE) on TYES agar supplemented with elastin, gelatin and skim milk (caseinase). The asterisk indicates significant reduction in protease activity ( $P < 0.05$ ) compared to the parent wild-type isolate. A clear zone ratio 1 indicates no protease activity. Isolates with no activity were excluded from the statistical analyses. Dark grey bars: phage-sensitive isolates forming rhizoid colony morphology, black bars: phage-resistant isolates forming rough morphology, light grey bar: phage-resistant isolate forming soft morphology.

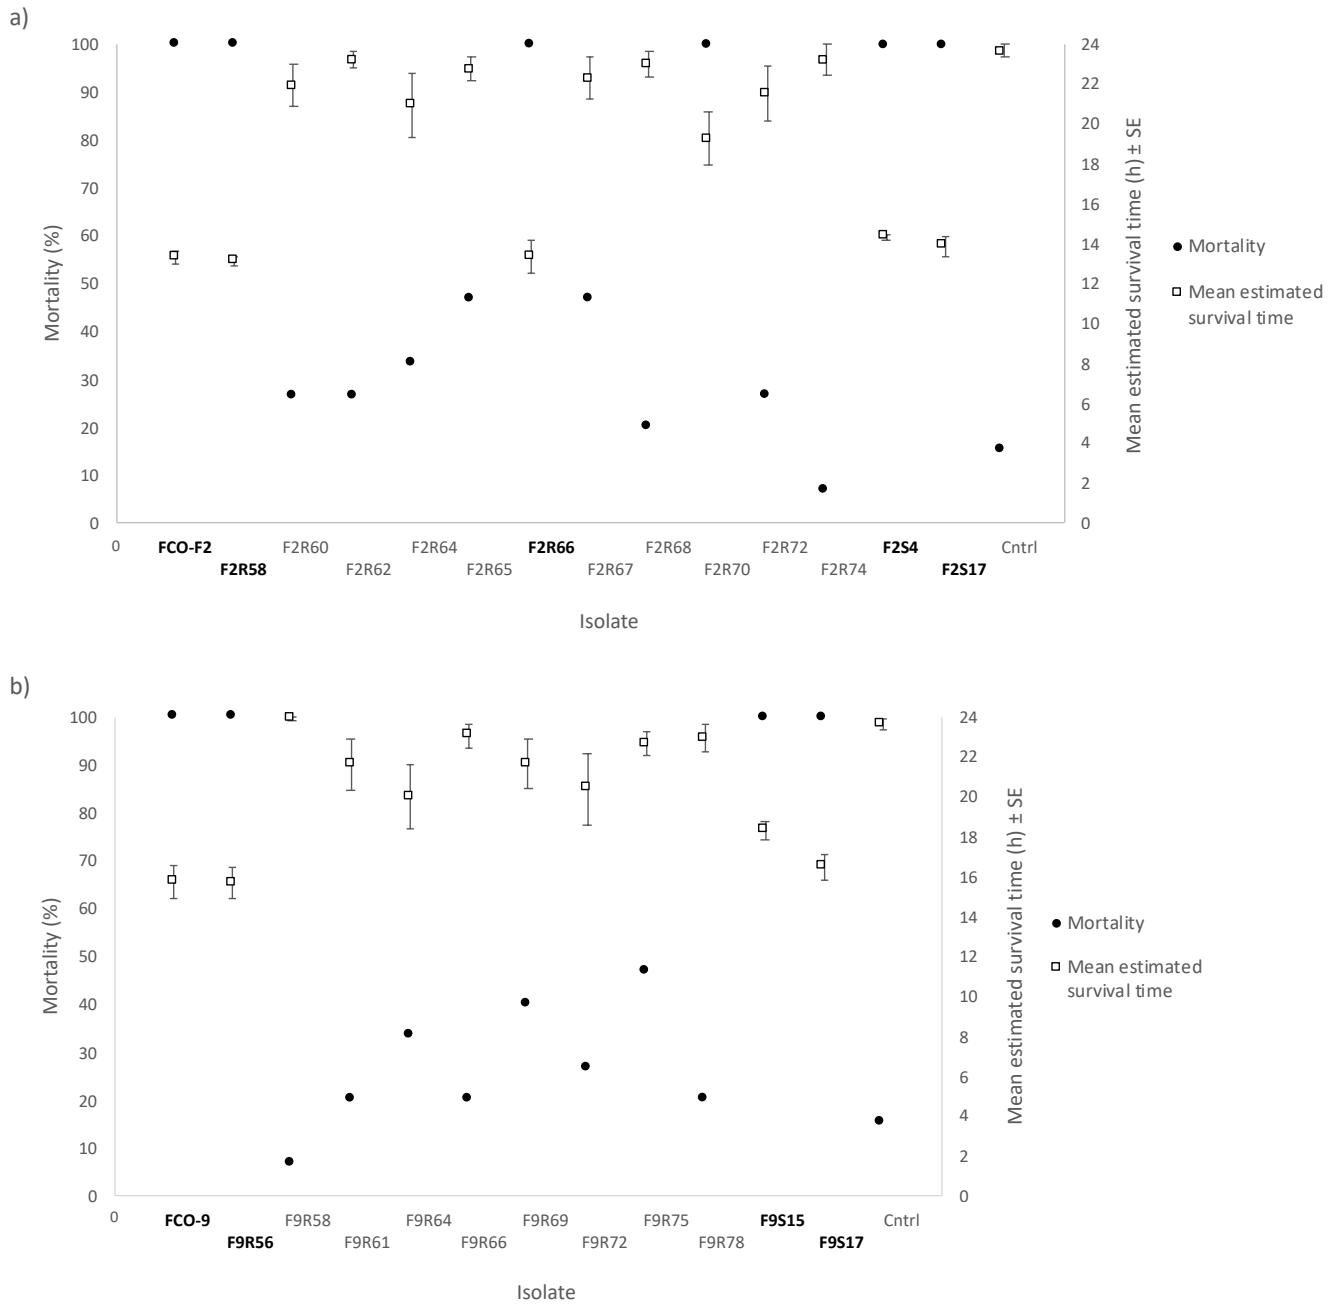

909

910 **Figure 6.** Mortality percent and estimated survival time ( $\pm$  SE) of rainbow trout  
 911 (*Oncorhynchus mykiss*) during 24-h experimental infection with wild-type *Flavobacterium*  
 912 *columnare* FCO-F2 (a) and FCO-F9 (b), and their phage-exposed (F2R- and F9R-) and no-  
 913 phage control (F2S- and F9S-) isolates. Phage-sensitive rhizoid colonies forming isolates are  
 914 written bold. Cntrl = control with no bacterial infection.  
 915

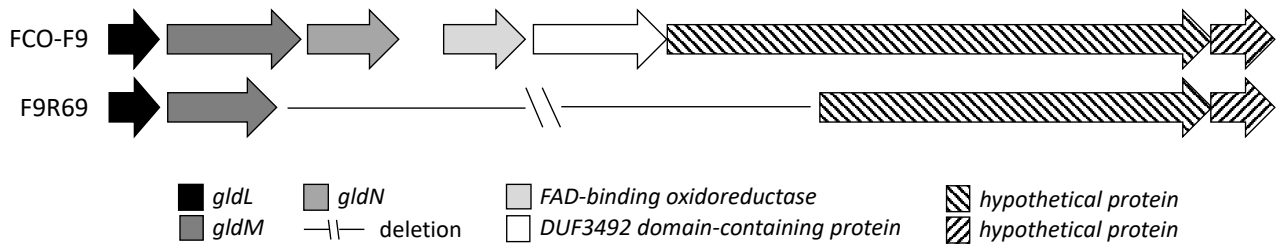

916  
917  
918  
919  
920  
921  
922

**Figure 7.** Deletion of genomic region covering 4 701 bp in FCOV-F13 exposed, soft colonies forming, phage-resistant *Flavobacterium columnare* isolate F9R69.

923 **Tables**

924

925 **Table 1.** *Flavobacterium columnare* isolates and phages used in this study. Bacteria and  
926 phages were isolated from Finnish fish farms. *F. columnare* isolates have previously been  
927 categorized into genetic groups by restriction fragment length polymorphism analysis of  
928 internal transcribed spacer region between 16S and 23S rRNA genes (This article was  
929 submitted to an online preprint archive [36]).

930

| 931 Bacterium | Genetic group    | Phage    | Genetic group of the | Farm   | Isolation |
|---------------|------------------|----------|----------------------|--------|-----------|
| 932 isolate   | of the bacterium | isolate  | phage isolation host | number | year      |
| 933 FCO-F2    | C                |          |                      | 1      | 2017      |
| 934 FCO-F9    | G                |          |                      | 2      | 2017      |
| 935           |                  | FCOV-F2  | C                    | 1      | 2017      |
| 936           |                  | FCOV-F5  | C                    | 3      | 2017      |
| 937           |                  | FCOV-F25 | C                    | 1      | 2017      |
| 938           |                  | FCL-2    | G                    | 2      | 2009      |
| 939           |                  | FCOV-F13 | G                    | 1      | 2017      |
| 940           |                  | FCOV-F45 | G                    | 2      | 2017      |

941



942 **Table 2.** Experimental setup of phage exposure of two phage-sensitive wild-type *Flavobacterium columnare* isolates FCO-F2 (high-virulence,  
 943 genotype C; exposed for phages FCOV-F2, FCOV-F5 and FCOV-F25) and FCO-F9 (medium-virulence, genotype G; exposed for phages FCL-  
 944 2, FCOV-F13 and FCOV-F45), and colony morphologies and phage susceptibilities of the 20 phage-exposed (F2R- and F9R-) and 4 no-phage  
 945 control isolates (F2S- and F9S-) obtained from the exposure cultures. The isolates are shown according to the phage they were exposed to. The  
 946 susceptibility of the isolates to phages used in exposures: + = sensitive, - = resistant, ± = sensitivity decreased compared to the parent wild-type  
 947 isolate, i = inhibition of bacterial growth, considered as phage resistance, ND = not determined.  
 948

| 949 Wild-type isolate | 950 Phage     | 951 Phage-exposed isolate | 952 No-phage control isolate | 953 Colony morphology of the isolate | 954 Phage susceptibility of the isolate |             |              |           |              |             |
|-----------------------|---------------|---------------------------|------------------------------|--------------------------------------|-----------------------------------------|-------------|--------------|-----------|--------------|-------------|
|                       |               |                           |                              |                                      | 955 FCOV-F2                             | 956 FCOV-F5 | 957 FCOV-F25 | 958 FCL-2 | 959 FCOV-F13 | 960 FCO-F45 |
| 961 FCO-F2            |               |                           |                              | 962 rhizoid                          | 963 +                                   | 964 +       | 965 +        | 966 ND    | 967 ND       | 968 ND      |
|                       | 969 FCOV-F2   | 970 F2R58                 |                              | 971 rhizoid                          | 972 ±                                   | 973 ±       | 974 ±        | 975 ND    | 976 ND       | 977 ND      |
|                       |               | 978 F2R60                 |                              | 979 rough                            | 980 -                                   | 981 -       | 982 -        | 983 ND    | 984 ND       | 985 ND      |
|                       |               | 986 F2R62                 |                              | 987 rough                            | 988 -                                   | 989 -       | 990 -        | 991 ND    | 992 ND       | 993 ND      |
|                       | 994 FCOV-F5   | 995 F2R64                 |                              | 996 rough                            | 997 -                                   | 998 -       | 999 -        | 1000 ND   | 1001 ND      | 1002 ND     |
|                       |               | 1003 F2R65                |                              | 1004 rough                           | 1005 -                                  | 1006 -      | 1007 -       | 1008 ND   | 1009 ND      | 1010 ND     |
|                       |               | 1011 F2R66                |                              | 1012 rhizoid                         | 1013 ±                                  | 1014 ±      | 1015 ±       | 1016 ND   | 1017 ND      | 1018 ND     |
|                       |               | 1019 F2R67                |                              | 1020 rough                           | 1021 -                                  | 1022 -      | 1023 -       | 1024 ND   | 1025 ND      | 1026 ND     |
|                       |               | 1027 F2R68                |                              | 1028 rough                           | 1029 -                                  | 1030 -      | 1031 -       | 1032 ND   | 1033 ND      | 1034 ND     |
|                       | 1035 FCOV-F25 | 1036 F2R70                |                              | 1037 rough                           | 1038 i                                  | 1039 i      | 1040 i       | 1041 ND   | 1042 ND      | 1043 ND     |
|                       |               | 1044 F2R72                |                              | 1045 rough                           | 1046 -                                  | 1047 -      | 1048 -       | 1049 ND   | 1050 ND      | 1051 ND     |
|                       |               | 1052 F2R74                |                              | 1053 rough                           | 1054 -                                  | 1055 -      | 1056 -       | 1057 ND   | 1058 ND      | 1059 ND     |
|                       | 1060 No phage |                           | 1061 F2S4                    | 1062 rhizoid                         | 1063 +                                  | 1064 +      | 1065 +       | 1066 ND   | 1067 ND      | 1068 ND     |
|                       |               |                           | 1069 F2S17                   | 1070 rhizoid                         | 1071 +                                  | 1072 +      | 1073 +       | 1074 ND   | 1075 ND      | 1076 ND     |
| 1077 FCO-F9           |               |                           |                              | 1078 rhizoid                         | 1079 ND                                 | 1080 ND     | 1081 ND      | 1082 +    | 1083 +       | 1084 +      |
|                       | 1085 FCL-2    | 1086 F9R56                |                              | 1087 rhizoid                         | 1088 ND                                 | 1089 ND     | 1090 ND      | 1091 ±    | 1092 ±       | 1093 ±      |
|                       |               | 1094 F9R58                |                              | 1095 rough                           | 1096 ND                                 | 1097 ND     | 1098 ND      | 1099 i    | 1100 i       | 1101 i      |
|                       |               | 1102 F9R61                |                              | 1103 rough                           | 1104 ND                                 | 1105 ND     | 1106 ND      | 1107 i    | 1108 i       | 1109 i      |
|                       | 1110 FCOV-F13 | 1111 F9R64                |                              | 1112 rough                           | 1113 ND                                 | 1114 ND     | 1115 ND      | 1116 -    | 1117 -       | 1118 -      |
|                       |               | 1119 F9R66                |                              | 1120 rough                           | 1121 ND                                 | 1122 ND     | 1123 ND      | 1124 i    | 1125 i       | 1126 i      |
|                       |               | 1127 F9R69                |                              | 1128 soft                            | 1129 ND                                 | 1130 ND     | 1131 ND      | 1132 i    | 1133 i       | 1134 i      |
|                       | 1135 FCOV-F45 | 1136 F9R72                |                              | 1137 rough                           | 1138 ND                                 | 1139 ND     | 1140 ND      | 1141 i    | 1142 i       | 1143 i      |
|                       |               | 1144 F9R75                |                              | 1145 rough                           | 1146 ND                                 | 1147 ND     | 1148 ND      | 1149 i    | 1150 i       | 1151 -      |
|                       |               | 1152 F9R78                |                              | 1153 rough                           | 1154 ND                                 | 1155 ND     | 1156 ND      | 1157 -    | 1158 -       | 1159 -      |
|                       | 1160 No phage |                           | 1161 F9S15                   | 1162 rhizoid                         | 1163 ND                                 | 1164 ND     | 1165 ND      | 1166 +    | 1167 +       | 1168 +      |
|                       |               |                           | 1169 F9S17                   | 1170 rhizoid                         | 1171 ND                                 | 1172 ND     | 1173 ND      | 1174 +    | 1175 +       | 1176 +      |

978 **Table 3.** Accession numbers of whole genome sequences of wild-type *Flavobacterium*  
979 *columnare* isolates FCO-F2 and FCO-F9 and their phage-exposed (F2R- and F9R) and no-  
980 phage control (F2S- and F9S-) isolates submitted to GenBank.

| 981  | <hr/>          |                         |
|------|----------------|-------------------------|
| 982  | <u>Isolate</u> | <u>Accession number</u> |
| 983  | FCO-F2         | CPO51861                |
| 984  | F2R58          | CP054506                |
| 985  | F2R60          | CP054505                |
| 986  | F2R62          | CP054504                |
| 987  | F2R64          | CP054503                |
| 988  | F2R65          | CP054502                |
| 989  | F2R66          | CP054501                |
| 990  | F2R67          | CP054500                |
| 991  | F2R68          | CP054499                |
| 992  | F2R70          | CP054498                |
| 993  | F2R72          | CP054497                |
| 994  | F2R74          | CP054496                |
| 995  | F2S4           | CP054495                |
| 996  | F2S17          | CP054494                |
| 997  | FCO-F9         | CP054518                |
| 998  | F9R56          | CP054517                |
| 999  | F9R58          | CP054516                |
| 1000 | F9R61          | CP054515                |
| 1001 | F9R64          | CP054514                |
| 1002 | F9R66          | CP054513                |
| 1003 | F9R69          | CP054512                |
| 1004 | F9R72          | CP054511                |
| 1005 | F9R75          | CP054510                |
| 1006 | F9R78          | CP054509                |
| 1007 | F9S15          | CP054508                |
| 1008 | <u>F9S17</u>   | <u>CP054507</u>         |
| 1009 |                |                         |

1010 **Table 4.** Data on genomes of wild-type *Flavobacterium columnare* strains FCO-F2 and  
1011 FCO-F9.

1012

| 1013 | Wild-type isolate | Genetic group | Genome size (bases) | N:o of ORFs | GC % |
|------|-------------------|---------------|---------------------|-------------|------|
| 1014 | FCO-F2            | C             | 3 221 312           | 3 280       | 31.7 |
| 1015 | FCO-F9            | G             | 3 261 403           | 3 374       | 31.7 |

1016 **Table 5.** Mutations revealed by whole genome sequencing (Illumina) in F2 phage-exposed *Flavobacterium columnare* isolates compared to their  
 1017 wild type (wt) isolate FCO-F2. The isolates are shown according to the phage they were exposed to. CDS = coding sequence, → = change to,  
 1018 Del = deletion, Ins = insertion, aa = amino acid.

| (Phage) | Phage-exposed isolate | Colony morphology | Gene/CDS                           | Mutation  | Location (base n:o) in wt genome | Outcome                                                          |
|---------|-----------------------|-------------------|------------------------------------|-----------|----------------------------------|------------------------------------------------------------------|
|         | (FCOV-F2)             |                   |                                    |           |                                  |                                                                  |
|         | F2R58                 | rhizoid           | rlmF                               | T → A     | 21 350                           | No aa change                                                     |
|         | F2R60                 | rough             | sprA                               | Ins GT    | 1 314 323 – 1 314 324            | Change in reading frame → stop codon<br>→ two truncated proteins |
|         | (FCOV-F5)             |                   |                                    |           |                                  |                                                                  |
|         | F2R62                 | rough             |                                    |           |                                  |                                                                  |
|         | F2R64                 | rough             | sprA                               | Ins G     | 1 317 523                        | Change in reading frame → stop codon<br>→ two truncated proteins |
|         | F2R65                 | rough             | sprA                               | Ins G     | 1 317 524                        | Change in reading frame → stop codon<br>→ two truncated proteins |
|         | F2R66                 | rhizoid           |                                    |           |                                  |                                                                  |
|         | F2R67                 | rough             | gldB                               | Del T     | 1 122 801                        | Truncated/wrong protein                                          |
|         | F2R68                 | rough             |                                    |           |                                  |                                                                  |
|         | (FCOV-F25)            |                   |                                    |           |                                  |                                                                  |
|         | F2R70                 | rough             | OmpH family outer membrane protein | Ins G     | 1 275 242                        | Change in reading frame<br>→ wrong protein                       |
|         | F2R72                 | rough             | gldN                               | Ins TCTAC | 1 013 274 – 1 013 278            | Change in reading frame → stop codon<br>→ two truncated proteins |
|         | F2R74                 | rough             | sprA                               | Del A     | 1 313 911                        | Change in reading frame → stop codon<br>→ two truncated proteins |

1044 **Table 6.** Mutations revealed by whole genome sequencing (Illumina) in F9 phage-exposed *Flavobacterium columnare* isolates compared to their  
 1045 wild type (wt) isolate FCO-F9. The isolates are shown according to the phage they were exposed to. CDS = coding sequence, → = change to,  
 1046 Del = deletion, nt = nucleotide, Ins = insertion, aa = amino acid  
 1047

| 1048 (Phage) | 1049 Phage-exposed isolate | 1050 Colony morphology | 1051 Gene/CDS                                | 1052 Mutation | 1053 Location (base n:o) in wt genome | 1054 Outcome                                                |
|--------------|----------------------------|------------------------|----------------------------------------------|---------------|---------------------------------------|-------------------------------------------------------------|
|              | F9R56                      | rhizoid                | DegT/DnrJ/EryC1/StrS family aminotransferase | C → T         | 657 725                               | Cys → Tyr                                                   |
|              |                            |                        | DUF255 domain -containing protein            | C → T         | 2 542 435                             | Stop codon → truncated protein                              |
|              | F9R58                      | rough                  |                                              |               |                                       |                                                             |
|              | F9R61                      | rough                  | Cystathionine gamma-synthase                 | G → A         | 1 720 857                             | His → Tyr                                                   |
|              | (FCOV-F13)                 |                        |                                              |               |                                       |                                                             |
|              | F9R64                      | rough                  | gldM                                         | Del CAA       | 2 732 551                             | Del Thr                                                     |
|              | F9R66                      | rough                  | Gliding motility                             | G → A         | 1 849 668                             | Stop codon → truncated protein                              |
|              | F9R69                      | soft                   | gldM                                         | Del 255 3' nt | 2 732 457 –                           | No/truncated protein                                        |
|              |                            |                        | gldN                                         | Del CDS       |                                       | No protein                                                  |
|              |                            |                        | FAD-binding oxidoreductase                   | Del CDS       |                                       | No protein                                                  |
|              |                            |                        | DUF3492 domain containing protein            | Del CDS       |                                       | No protein                                                  |
|              |                            |                        | Hypothetical protein                         | Del 454 5' nt | – 2 737 157                           | No/truncated protein                                        |
|              | (FCOV-F45)                 |                        |                                              |               |                                       |                                                             |
|              | F9R72                      | rough                  | gldG                                         | Ins T         | 3 023 647                             | Change in reading frame<br>→ wrong protein                  |
|              | F9R75                      | rough                  | gldN                                         | Ins G         | 2 733 099                             | Start and stop codon<br>→ two truncated proteins            |
|              | F9R78                      | rough                  | gldM                                         | Ins A         | 2 731 567                             | Change in reading frame<br>→ stop codon → truncated protein |
