1 **Bacteriophage Resistance Affects *Flavobacterium columnare* Virulence Partly via**  
2 **Mutations in Genes Related to Gliding Motility and Type IX Secretion System**

3

4 Heidi M. T. Kunttu<sup>1#</sup>, Anniina Runtuvuori-Salmela<sup>1</sup>, Krister Sundell<sup>2</sup>, Tom Wiklund<sup>2</sup>,  
5 Mathias Middelboe<sup>3</sup>, Lotta Landor<sup>2\*</sup>, Roghaieh Ashrafi<sup>1</sup>, Ville Hoikkala<sup>1</sup>, Lotta-Riina  
6 Sundberg<sup>1</sup>

7

8 <sup>1</sup>Department of Biological and Environmental Science and Nanoscience Center, University of  
9 Jyväskylä, Jyväskylä, Finland

10 <sup>2</sup>Laboratory of Aquatic Pathobiology, Åbo Akademi University, Turku, Finland

11 <sup>3</sup>Department of Biology, Marine Biological Section, University of Copenhagen, Helsingør,  
12 Denmark

13

14 **Running Head:** Phage Resistance in *Flavobacterium columnare*

15

16 **Keywords:** bacteriophage, colony morphology, *Flavobacterium columnare*, gliding motility,  
17 mutation, phage resistance, type IX secretion system, virulence

18

19 #Address correspondence to Heidi M. T. Kunttu, [heidi.kunttu@jyu.fi](mailto:heidi.kunttu@jyu.fi)

20 \*Present address: Lotta Landor, Department of Biological Sciences, University of Bergen,  
21 Bergen, Norway

22

23 **Abstract**

24

25 Increasing problems with antibiotic resistance has directed interest towards phages as tools to  
26 treat bacterial infections in the aquaculture industry. However, phage resistance evolves  
27 rapidly in bacteria posing a challenge for successful phage therapy. To investigate phage  
28 resistance in the fish pathogenic bacterium *Flavobacterium columnare*, two phage-sensitive,  
29 virulent wild-type isolates, FCO-F2 and FCO-F9, were exposed to phages and subsequently  
30 analyzed for bacterial viability and colony morphology. Twenty-four phage-exposed isolates  
31 were further characterized for phage resistance, antibiotic susceptibility, motility, adhesion  
32 and biofilm formation on polystyrene surface, protease activity, whole genome sequencing  
33 and virulence against rainbow trout fry. Bacterial viability first decreased in the exposure  
34 cultures, subsequently increasing after 1-2 days. Simultaneously, the colony morphology of  
35 the phage-exposed isolates changed from original rhizoid to rough. The rough isolates arising  
36 in phage exposure were phage-resistant with low virulence, whereas rhizoid isolates  
37 maintained phage sensitivity, though reduced, and high virulence. Gliding motility and  
38 protease activity were also related to the phage sensitivity. Observed genetic mutations in  
39 phage-resistant isolates were mostly located in genes coding for type IX secretion system, a  
40 component of the flavobacterial gliding motility machinery. However, there were mutational  
41 differences between individual isolates, and not all phage-resistant isolates had genetic  
42 mutations. This indicates that development of phage resistance in *F. columnare* probably is a  
43 multifactorial process including both genetic mutations and changes in gene expression.  
44 Phage resistance may not, however, be a challenge for development of phage therapy against  
45 *F. columnare* infections, since phage resistance is associated with decrease in bacterial  
46 virulence.

47

## 48 **Importance**

49

50 Phage resistance of infectious bacteria is a common phenomenon posing challenges for  
51 development of phage therapy. Along with growing World population and need for increased  
52 food production, constantly intensifying animal farming has to face increasing problems of  
53 infectious diseases. Columnaris disease, caused by *F. columnare*, is a worldwide threat for  
54 salmonid fry and juvenile farming. Without antibiotic treatments, infections can lead to 100%  
55 mortality in a fish stock. Phage therapy of columnaris disease would reduce a development of  
56 antibiotic-resistant bacteria and antibiotic loads by the aquaculture industry, but phage-  
57 resistant bacterial isolates may become a risk. However, phenotypic and genetic  
58 characterization of phage-resistant *F. columnare* isolates in this study revealed that they are  
59 less virulent than phage-sensitive isolates and thus not a challenge for phage therapy against  
60 columnaris disease. This is a valuable information for the fish farming industry globally  
61 when considering phage-based prevention and curing methods for *F. columnare* infections.

62

## 63 **Introduction**

64

65 Aquaculture has a central role in supporting the increasing demand for high quality protein  
66 and healthy food. However, the use of chemotherapy in disease treatment in the industry has  
67 led to increased resistance of disease-causing agents to commonly used antibiotics (1, 2).  
68 Further, in the face of climate warming, production of protein with smaller carbon footprint is  
69 of increasing importance. This has put a pressure on aquaculture industry to increase  
70 efficiency in food production, which also means developing more effective ways to fight  
71 infectious diseases in intensive farming including reduction the use of antibiotics. Although  
72 vaccines against many microbial diseases are in use globally in aquaculture, there are still

73 many diseases with no potent immunization method available (3). This applies especially to  
74 infections of fish fry, where efficiency of vaccination is poor due to lack of development of  
75 fish secondary immunity at the early life stage.

76

77 One of these diseases affecting fry is caused by the fish pathogenic bacterium  
78 *Flavobacterium columnare*, the infectious agent of columnaris disease. Columnaris infections  
79 cause extensive losses in farmed salmonid fry and juveniles, populations of different catfish  
80 species and ayu (*Plecoglossus altivelis*) around the world in water temperatures above 18 °C.  
81 The only effective curing method is antibiotic treatment. However, infections often occur  
82 repeatedly and may cause up to 100% mortality in rainbow trout fry populations if not  
83 treated, thus causing major economic losses to the industry (4, 5). In addition, elevated water  
84 temperatures due to warmer summers in the recent years are suggested to enhance virulence  
85 development in *F. columnare* (5). Although antibiotic resistance in this bacterium is not yet  
86 as severe problem as in related pathogens, e.g. *Flavobacterium psychrophilum* (6, 7) or  
87 *Vibrio* species (8, 9), strains that have acquired resistance towards commonly used antibiotics  
88 already exist (10).

89

90 Bacteriophages (phages) are viruses that specifically infect their host bacteria, without  
91 harming the surrounding microbial community (reviewed in 11). Among the alternatives to  
92 traditional antibiotics, phage therapy, i.e. the use of phages against bacterial infections, has  
93 demonstrated a strong potential for controlling disease outbreaks in aquaculture (e.g. 12-14).  
94 Promising results have been gained also in phage therapy trials of Flavobacterial infections.  
95 In a study by Castillo et al. (15), phage treatment reduced the mortality of *F. psychrophilum*-  
96 infected Atlantic salmon (*Salmo salar*) by 60 % and rainbow trout (*Oncorhynchus mykiss*) by  
97 67 %. In studies with columnaris infections, mortality of zebra fish (*Danio rerio*) and

98 rainbow trout were reduced by 100 % and nearly 42 %, respectively, in the presence of  
99 phages (16). In addition, pre-colonization of fish with phage significantly slowed down the  
100 infection and reduced the mortality of rainbow trout (17).

101

102 One of the biggest challenges for phage therapy is the imposed selection for phage resistance  
103 among phage-exposed bacteria. Bacteria have developed a variety of phage defence  
104 strategies, including surface modification and cell aggregation, inactivation of intruding  
105 phage DNA by Restriction-Modification and CRISPR-Cas systems, proteolytic digestion of  
106 phage particles, and quorum sensing regulation of phage receptor expression (e.g. 18- 20).

107 The prevalence and control of these resistance mechanisms depend specifically on the phage-  
108 bacterium interaction, on the type and function of the receptor, and the costs of engaging the  
109 different mechanisms under various environmental conditions. In many pathogenic bacteria  
110 the cell surface molecules are functioning as virulence factors, and phage-driven changes in  
111 these structures leading to phage resistance often lead to simultaneous reduction in virulence  
112 (21). This trade-off has been detected also among several bacterial fish pathogens, e.g. in  
113 *Pseudomonas plecoglossicida* (22), *F. psychrophilum* (23) and *Vibrio anguillarum* (24).

114

115 Exposing *F. columnare* to phages has been observed to cause a change in colony  
116 morphology from the ancestral rhizoid form to rough, which is associated with loss of  
117 gliding motility and virulence (25-27). Since a change in colony morphology and loss of  
118 virulence have been observed previously also by deletion of genes in the Type IX secretion  
119 system involved in gliding motility of *F. columnare* (28), it is likely that mutations in this  
120 secretion system are also linked with phage resistance in *F. columnare* (29). Yet, the exact  
121 mechanisms by which phages cause the colony morphology change in *F. columnare*, and the  
122 functional implications for the bacteria have not been previously explored.

123

124 Understanding the mechanisms and consequences of phage resistance in the target bacteria is  
125 central for development of successful phage therapy. Thus, in this study, we exposed two *F.*  
126 *columnare* isolates (FCO-F2 and FCO-F9) separately to three different phages, and studied  
127 infection dynamics, bacterial viability and colony morphology, and isolated phage-resistant  
128 bacteria. Twenty-four phage-exposed and no-phage control isolates were further  
129 characterized for their phage resistance, antibiotic susceptibility, motility, adhesion and  
130 biofilm formation on polystyrene surface, protease (elastinase, gelatinase and caseinase)  
131 activity, virulence on rainbow trout fry, and whole genome sequence. Our results show, that  
132 if phage resistance in *F. columnare* is gained via surface modification leading to morphotype  
133 change, virulence decreases. However, if the colony morphology remains rhizoid, the isolates  
134 remain highly virulent with reduced sensitivity to phage compared to the ancestral wild-type  
135 strain.

136

## 137 **Results**

138

### 139 *Isolates from phage-exposures: growth, colony morphology and phage resistance*

140

141 In all phage-exposure cultures of FCO-F2, there was a strong initial phage control of the host  
142 population during the first day in all the phage-exposed cultures compared with control  
143 culture without phages (Figure 1a). After this, the bacterial density started to recover. The  
144 phage-free cultures grew exponentially during the first day, after which they reached a  
145 plateau phase. Along with the population decline on day 1, bacterial colony morphotype  
146 changed from ancestral rhizoid to rough (Figure 2). From day 1 onwards, more than 88% of  
147 the colonies formed by phage-exposed bacterial isolates were rough, the amount reaching at

148 least 97% at the end of the experiment (Figure 1c). In addition, in FCOV-F25 exposure, few  
149 soft colonies were observed on day 2 (Figure 2), and in no-phage control cultures, some  
150 rough colonies appeared among the prevailing rhizoid ones.

151

152 FCO-F9 showed slightly different growth dynamics. The bacterial population size increased  
153 exponentially during the first day in all cultures (Figure 1b), but decreased drastically on day  
154 2 in response to phage exposure, and then reached exponential growth again. The phage-free  
155 cultures reached a plateau phase on day 2, after which the amount of culturable bacteria  
156 decreased. From the day 2 population crash and onwards, more than 85% of the colonies  
157 formed by phage-exposed bacteria had rough morphology (Figure 1d). At the end of the  
158 experiment, more than 98% of the colonies were rough. In FCOV-F13 exposure, a few  
159 rough colonies were observed already on day 1 and some soft colonies on days 2 and 3. In no-  
160 phage control cultures, some (4 %) rough colonies appeared among the rhizoid ones on day 3.

161

162 Out of 189 colonies collected from phage exposures, 20 phage-exposed and 4 no-phage  
163 control isolates were characterized further (Table 1). Of these isolates, the no-phage control  
164 isolates all formed rhizoid colonies similar to their wild-type parent, phage-sensitive isolates  
165 FCO-F2 and FCO-F9. Most of the phage-exposed isolates were of rough colony morphology,  
166 but F2R58, F2R66 and F9R56 had rhizoid, and F9R69 soft colony morphology.

167

168 All the phage-exposed rough isolates were resistant to all the phages used to infect the  
169 ancestor wild-type bacteria (Table 1). In addition, in some cases, phage caused inhibition of  
170 bacterial growth, considered as phage resistance because no clear plaques due to phage  
171 infection were detected. The rhizoid phage-exposed isolates turned out to be partly phage-  
172 resistant with a  $5.5 \times 10^5$  to  $11 \times 10^5$ -fold reduction in phage susceptibility compared to the

173 wild type isolates, depending on the specific phage (results not shown). Throughout this  
174 paper, these isolates with decreased phage sensitivity are grouped together with the phage-  
175 sensitive isolates.

176

### 177 *Antibiotic susceptibility*

178

179 All isolates showed antibiotic susceptibility patterns similar to the parent wild-type isolates,  
180 and no notable differences were observed (Figure S1 and Table S1).

181

### 182 *Motility, adhesion and biofilm formation*

183

184 Phage-sensitive bacteria forming rhizoid colonies were significantly more motile (determined  
185 as colony spreading) than phage-resistant rough or soft morphotypes, irrespective of isolation  
186 history (F2-isolates:  $P < 0.001$ , Oneway ANOVA, LG10 transformation; F9-isolates:  $P \leq$   
187  $0.004$ , Mann-Whitney test) (Figure 3).

188

189 Compared to the parent wild-type FCO-F2 isolate, there was a large variability on the  
190 adhesion capacity of individual phage-resistant F2-isolates (Figure 4a). Phage susceptibility  
191 (rhizoid vs. rough colony type) or phage used in the co-culture experiment did not influence  
192 bacterial adhesion capacity ( $P = 0.3$ : Mann-Whitney test and  $P = 0.564$ : Kruskal-Wallis test,  
193 respectively).

194

195 Most of the individual phage-exposed and no-phage control F2-isolates had significantly  
196 lower biofilm forming capacity than in parent wild-type FCO-F2 ( $P \leq 0.017$ : Oneway  
197 ANOVA, LDS multiple comparisons, square root transformation) (Figure 4c). Still, there was



198 no statistical difference in biofilm formation between phage-sensitive rhizoid and resistant  
199 rough morphology F2-isolates ( $P = 0.062$ : Oneway ANOVA).

200

201 Again, the bacterial strain F9 behaved differently compared to F2. In contrast to the phage-  
202 resistant F2-isolates, the phage-resistant rough and soft morphology F9-isolates had  
203 significantly lower adherence than sensitive rhizoid isolates ( $P < 0.001$ : Oneway ANOVA,  
204 LDS multiple comparisons, square root transformation) (Figure 4b). In addition, isolates  
205 exposed to phages isolated in 2017, FCOV-F13 and FCOV-F45, had significantly lower  
206 adhesion capacity than in isolates exposed to FCL-2 isolated in 2009 ( $P < 0.001$ : Mann-  
207 Whitney test). This may indicate phage FCL-2 uses different phage receptor (see later).

208

209 In contrast to adhesion ability, biofilm forming capacity of the most of the individual phage-  
210 exposed and no-phage control F9-isolates was significantly higher compared to wild-type  
211 parent isolate ( $P \leq 0.004$ : Oneway ANOVA, LDS multiple comparisons) (Figure 4d). F9R69  
212 with soft colony morphology did not form any biofilm and thus excluded from the multiple  
213 comparisons. Phage-resistant rough F9-isolates had significantly higher biofilm forming  
214 capacity than sensitive rhizoid morphotypes ( $P < 0.001$ : Oneway ANOVA, square root  
215 transformation).

216

217 *Protease activity: elastinase, gelatinase and caseinase*

218

219 Elastinase activity was detected in the wild-type, and all the phage-sensitive rhizoid FCO-F2  
220 isolates and one resistant rough F2-isolate (clear zone ratio  $> 1$ ), whereas all remaining  
221 resistant, rough morphology isolates, had completely lost the ability to degrade elastin  
222 (Figure 5a). There were no differences in elastinase activity between the elastinase positive

223 isolates ( $P = 0.843$ : Oneway ANOVA). Elastinase activity was not detected in any of the F9-  
224 isolates (clear zone ratio = 1) (Figure 5b).

225

226 There were variations in gelatinase activity between individual F2- and F9-isolates (Oneway  
227 ANOVA, LDS multiple comparisons) (Figure 5c and d). However, among both F2- and F9-  
228 isolates, gelatinase activity of phage-resistant rough morphotypes was lower than that of  
229 sensitive rhizoid morphotypes (F2-isolates:  $P = 0.018$ , Oneway ANOVA, exponential  
230 transformation; F9-isolates:  $P < 0.001$ , Oneway ANOVA). Two of the phage-exposed F9-  
231 isolates (F9R69 and F9R78) did not have any gelatinase activity and were thus excluded from  
232 the multiple comparisons

233

234 Less variation in caseinase activity between individual isolates was observed (Oneway  
235 ANOVA, LDS multiple comparisons) (Figure 5e and f), and phage-sensitive rhizoid and  
236 resistant rough F2-isolates did not differ from each other ( $P = 0.058$ : Oneway ANOVA. On  
237 the other hand, caseinase activity of phage-resistant rough and soft F9-isolates was lower  
238 than that of sensitive rhizoid isolates ( $P = 0.007$ : Oneway ANOVA).

239

240 *Virulence*

241

242 Rainbow trout fry were exposed to wild-type, phage-exposed and no-phage control isolates,  
243 and all of them caused mortality during 24 h (Figure 6). The phage-sensitive rhizoid  
244 morphotypes were most virulent, causing 100 % mortality, whereas resistant rough and soft  
245 morphotypes were less virulent, causing 46.7 % mortality at highest (except for phage-  
246 resistant rough morphotype F2R70, which caused 100 % mortality). Mortality of control fish  
247 was 15 %, but no bacterial growth was observed from these fish. However, *F. columnare*

248 growth was observed from all the fish exposed to bacteria. Colony morphotype of the  
249 bacterial isolates did not change during the infection.

250

251 When comparing the data according to the phage susceptibility and thus colony morphology,  
252 cumulative mortality of fish infected with phage-sensitive rhizoid morphotypes, irrespective  
253 of if they were wild-type, phage-exposed or no-phage control isolates, was significantly  
254 higher than mortality caused by phage-resistant rough or soft morphotypes among both F2  
255 and F9 isolates ( $P < 0.001$ , Kaplan-Meier Survival Analysis). Also, the estimated survival  
256 time (Kaplan-Meier Survival Analysis) was shortest in fish infected with sensitive rhizoid  
257 isolates (Figure 6). In case of F2-isolates, mortality caused by phage-resistant rough isolates  
258 was also significantly higher than mortality of control fish, but mortality caused by resistant  
259 rough and soft F9-isolates did not differ from each other or from the control fish mortality.  
260 Mortality caused by rhizoid phage-sensitive F2 isolates started to peak at 12 hours post  
261 infection (p.i.) and in F9 at 16 hours p.i. ( $P < 0.001$ , Kaplan-Meier Survival Analysis), but  
262 between rough phage-resistant F2 and F9 isolates the mortality patterns were more similar  
263 starting to increase slowly at 2-3 hours p.i. ( $P = 0.217$ , Kaplan-Meier Survival Analysis).  
264 However, there were differences in cumulative mortalities caused by individual isolates in  
265 each morphology group (Data set S1).

266

267 *Whole genome sequencing*

268

269 Genome data of wild-type *F. columnare* isolates FCO-F2 and FCO-F9 is presented in Table  
270 2.

271

272 Genomic comparisons between F2 wild type and phage-exposed isolates revealed a limited  
273 number of genomic changes. In seven out of 11 isolates, single mutation leading to formation  
274 of wrong or truncated proteins was observed in the phage-resistant mutants (Table 3).  
275 Notably, the majority of the mutations were located in genes coding for gliding motility  
276 proteins *gldB* (F2R67), *gldN* (F2R72) and *sprA* (F2R60, F2R64, F2R65, F2R74). Isolate  
277 F2R70 had one nucleotide insertion in OmpH family outer membrane protein coding gene.  
278 Three isolates (F2R62, F2R66, F2R68) did not show any genomic changes relative to the  
279 wild type. In isolate F2R58 with decreased phage sensitivity, one nucleotide change in *rlmF*  
280 gene (coding for rRNA large subunit methyltransferase F) did not lead to amino acid change.  
281 No mutations were observed in the no-phage control isolates. At certain points of ribosomal  
282 RNA operons in all phage-exposed and no-phage control isolates, and also in a 736 221 bp  
283 sequence (hypothetical protein coding sequence in wild-type FCO-F2 genome used as a  
284 reference) in phage-exposed isolates F2R66 and F2R68, there was a poor coverage of reads  
285 leading to unclear sequences, which prevented detection of possible mutations in this region.  
286  
287 In F9 phage-exposed isolates, one or two mutations per isolate in all the other isolates, except  
288 for F9R58, were observed (Table 4). Mutations in isolates exposed to FCOV-F45 had  
289 insertions whereas FCOV-F13 exposed isolates had deletions or single nucleotide changes in  
290 genes coding for gliding motility proteins *gldG* (F9R72), *gldM* (F9R64, F9R69, F9R78) and  
291 *gldN* (F9R69, F9R75), leading to formation of wrong or truncated proteins. Interestingly, in  
292 the isolate F9R69 (exposed to FCOV-F13) with a soft colony type, a deletion of genomic  
293 region of 4 701 bp was observed, spanning over gliding motility genes *gldM* and *gldN*, and  
294 sequences coding for FAD-binding oxidoreductase, DUF3492 domain-containing protein and  
295 a hypothetical protein (Figure 7).

296

297 On the contrary, no mutations in gliding motility genes were observed in F9 isolates exposed  
298 to FCL-2, but instead, two of these isolates had one nucleotide change in  
299 DegT/DnrJ/EryC1/StrS family aminotransferase and DUF255-domain containing protein  
300 (F9R56), and cystathionine gamma-synthase (F9R61) coding genes, leading to either one  
301 amino acid change or truncated protein. No mutations were observed in no-phage control  
302 isolates. Around 2 000 620 bp (hypothetical protein coding sequence in B185 genome used as  
303 a reference), there was a poor coverage of reads leading to unclear sequence in both wild type  
304 FCO-F9, phage-exposed and no-phage control isolates, which prevented detection of possible  
305 mutations in this region.

306

## 307 **Discussion**

308

309 Phage therapy is seen as an attractive option to treat and prevent bacterial diseases, but the  
310 development of phage resistance in target bacteria is considered as one of the main problems  
311 related to the use of phages. Our results describe the selection for phage resistance in two  
312 different *F. columnare* isolates upon exposure to six specific phages. We show that phage  
313 resistance is associated with reduction in virulence and virulence-related phenotypic changes  
314 in the bacterium. Our genetic data indicate that in most cases phage resistance is caused by  
315 surface modifications, often related to the type IX secretion system connected to  
316 flavobacterial gliding motility machinery. Mutations in the genes coding for an outer  
317 membrane protein or genes related to gliding motility seem to be phage specific and likely  
318 prevent phage attachment, possibly in a phage specific manner, and lead to morphology  
319 change and loss of virulence.

320

321 In the present study, phage-exposure caused significant changes in bacterial phenotypic  
322 characteristics (motility, adhesion, protein secretion and virulence - details below) leading to  
323 phage resistance. In most isolates, these changes could be linked to changes in gliding  
324 motility-related genes. Flavobacteria show gliding motility on surfaces (29), and mutations in  
325 any of the genes coding for gliding motility machinery proteins have been shown to lead to  
326 loss of motility (e.g. 30, 31). Gliding is also connected to virulence, since part of the gliding  
327 motility machinery (GldK, GldL, GldM, GldN, PorV, SprA, Spr E, SprF and SprT) is used as  
328 a type IX secretion system found in Bacteroidetes (28, 32). Indeed, phage resistance due to  
329 loss of motility has been linked with decreased virulence in *F. columnare* also previously  
330 (27), and *F. columnare gldN* mutants have been shown to exhibit both decreased proteolytic  
331 and chondroitinase activity, and virulence on rainbow trout (28). Similarly, phage resistance  
332 was associated with loss of motility and mutations in genes related to cell surface properties  
333 and gliding motility in *F. psychrophilum* (23) and in *F. johnsoniae* (31, 33). Together, the  
334 results suggest that the type IX secretion system is a key target for infection by a wide range  
335 of phages and across the Flavobacterium genus, and that mutations leading to morphology  
336 changes and loss of motility is a general response to phage exposure in this bacterial group.  
337  
338 Exposure to a specific phage led to different mutations in gliding motility genes in different  
339 *F. columnare* isolates, as also seen in phage-resistant *F. psychrophilum* (23), indicating that  
340 several genes are involved in phage attachment and infection of *F. columnare* phages.  
341 Furthermore, genomic analysis of one soft colony isolate revealed a large deletion (4 701 bp),  
342 spanning over two gliding motility genes. However, although all rough colony forming  
343 isolates were phage-resistant, not all these isolates (F2R62, F2R66, F2R68 and F9R58) had  
344 mutations in genes coding for proteins related to gliding motility, or elsewhere in their  
345 genome. This may indicate that development of phage resistance and colony morphology

346 change are also influenced by gene expression or epigenetic modifications, leading to  
347 variation in colony morphology, as suggested previously (34). For example, in *Bordetella*  
348 spp, phage resistance is regulated via phase variation in virulence related factors, such as  
349 some adhesins, toxins and type III secretion system (reviewed in 35). Interestingly, isolates  
350 exposed to FCL-2 did not have mutations in gliding motility related genes, suggesting that  
351 FCL-2 uses other receptors for infection of *F. columnare* than the other phages. FCL-2  
352 differs genetically from other phages infecting genetic group G bacteria (This article was  
353 submitted to an online preprint archive [36]), supporting this suggestion.

354

355 Generally, point mutations and changes in receptor expression enable a rapid and efficient  
356 response of bacterial populations to phage exposure. However, the large phenotypic costs of  
357 mutational derived phage resistance observed in *F. columnare* in this study suggest that these  
358 mutations may be dynamic and most probably also rapidly reverting back to the sensitive  
359 form in *F. columnare*. Indeed, reversion of both phage-driven and spontaneously formed  
360 rough colony types back to rhizoid has been observed to happen in *F. columnare* subcultures  
361 (27). Various mechanisms to regain phage resistance have been found also in fish pathogenic  
362 *F. psychrophilum* (23) and *V. anguillarum* (24), in which a rapid reversion back to phage-  
363 sensitive phenotype has been shown to occur. This sort of dynamics in phage resistance has  
364 also been observed in a human symbiont *Bacteroides thetaiotaomicron* (37), suggesting that  
365 the phenomenon may be common among wide variety of bacteria.

366

367 Phage-exposed *F. columnare* isolates F2R56, F2R66 and F9R58 did not respond to phage  
368 infection with surface modifications, but maintained their original rhizoid colony morphotype  
369 and high virulence. These rhizoid isolates were not completely resistant to phage, although  
370 phage infection efficiency dropped markedly (up to a million-fold decrease), suggesting some

371 other mechanism for reducing infection efficiency. *F. columnare* has two functional CRISPR  
372 systems, which have been shown to adapt under phage exposure at fish farms (38). However,  
373 we did not observe additional CRISPR spacers in whole genome sequencing. The same was  
374 observed in phage exposed *F. psychrophilum* isolates in which no differences to the wild-  
375 type strain's CRISPR composition were found (23). In our experience, CRISPR adaptation in  
376 *F. columnare* requires different experimental set-up with longer co-culture time in low  
377 nutrient medium, followed by enrichment in high-nutrient medium (This article was  
378 submitted to an online preprint archive [39]). Thus, the decreased phage sensitivity of rhizoid  
379 phage exposed isolates most probably is a consequence of yet unknown functions which need  
380 to be studied in the future.

381

382 In addition to type IX secretion system, also type I and VI secretion systems are known to  
383 function in *F. columnare* (40). Possible secretion of virulence related factors through type I  
384 and VI secretion systems in *F. columnare* could be one of the reasons why also rough phage-  
385 resistant isolates caused some mortality in fish, and explain their gelatinase and caseinase  
386 activity despite morphology change. It has also been shown recently, that virulence of *F.*  
387 *columnare* increases in the mucus and with increasing mucin concentration (17). As the  
388 mucus-covered fish surface is the main infection route of *F. columnare*, it is probable that  
389 some *F. columnare* virulence factors, such as proteinase activity, are expressed differently in  
390 growth media compared to the *in vivo* infection situation. This possible differential  
391 expression could also explain the mortality caused by phage-resistant rough isolates.

392

393 The ability to adhere and form biofilm has a major role in bacterial infections and in  
394 colonizing niches (41). In *F. columnare*, adhesion and biofilm forming capacity may have a  
395 central role in their persistence in the farming environment (e.g. tanks and water systems)



396 (42), but also in establishing the first steps of infection on the fish surfaces (43). Our results  
397 indicate that *F. columnare* strains differ in their adherence and biofilm forming  
398 characteristics. Whereas phage exposure had no clear effect on the adhesion capacity of the  
399 F2-isolates, phage resistance led to decrease in biofilm forming capacity in most of the  
400 individual phage-resistant F2-isolates. This is in agreement with the systematic reduction in  
401 biofilm forming properties of phage-resistant *F. psychrophilum* relative to the wild type (23).  
402 Adhesion capacity of F9 phage-resistant isolates, on the other hand, was significantly lower  
403 compared to the wild-type parent isolate, but rough phage-resistant F9-isolates had  
404 significantly higher biofilm forming capacity compared to rhizoid sensitive isolates. These  
405 results partly differ from what we have found earlier (25, 26), most likely because in the  
406 previous studies the rough colonies were formed spontaneously, without phage exposure.  
407 Indeed, morphology of spontaneously formed rough colonies and these morphotypes' ability  
408 to move when cultured in low-nutrient media differ from rough morphotypes formed under  
409 phage exposure (27). However, together our results indicate, that since *F. columnare* phages  
410 are genetically group-specific, they might be using different receptors, which, in turn, causes  
411 differences in bacterial resistance mechanisms between genetic groups.  
412  
413 *F. columnare* infections are routinely treated by antibiotics at fish farms. In this study, phage  
414 resistance did not affect the antibiotic susceptibility of any of the isolates studied. Lack of  
415 association between development of antibiotic resistance and bacteriophage resistance has  
416 also been shown e.g. in *Escherichia coli* (44). Based on our results, phage resistance does not  
417 increase a risk of antibiotic resistance development, and thus, phage-therapy given as a cure  
418 or prophylactic treatment at fish farms most probably does not rule out the possible  
419 concomitant use of antibiotics as therapeutic agents against columnaris infections. Indeed, it  
420 was shown by using *P. fluorescens* as a model bacterium, that applying phages together

421 with antibiotic treatments may inhibit the evolution of antibiotic resistance in pathogenic  
422 bacteria (45).

423

424 To summarize, our results show, that even though *F. columnare* rapidly develops phage  
425 resistance under phage exposure, the arise of phage resistance does not pose a high risk for a  
426 development of phage therapy against columnaris infections in rainbow trout. This is because  
427 phage resistance leads to decrease in bacterial virulence, adherence to surfaces and protease  
428 secretion. Based on our results with experiments with two genetically different wild-type  
429 bacterial isolates, development and regulation of phage resistance in *F. columnare* is a  
430 multifactorial process, partly affected by formation of mutations mainly in gliding motility  
431 and type IX secretion system related genes, and partly by other defence mechanisms against  
432 phages, the function of which needs to be studied in the future.

433

## 434 **Materials and methods**

435

### 436 *Bacterial and phage isolates*

437

438 Bacteria and phages used in this study were isolated from water samples collected from fish  
439 farms during columnaris outbreaks (This article was submitted to an online preprint archive  
440 [36]) (Table 5). Bacteria were confirmed as *F. columnare* by restriction fragment length  
441 polymorphism (RFLP) analysis of 16S rRNA gene and classified into genetic groups by  
442 RFLP of 16S-23S internal transcribed spacer (ITS) region (This article was submitted to an  
443 online preprint archive [36]). All the six phages belong to the *Myoviridae* family and have  
444 been characterised with respect to host range and genomic composition (This article was  
445 submitted to an online preprint archive [36]).

446

447 *Bacterial cultures and phage lysates*

448

449 For phage exposure and virulence test, *F. columnare* isolates were inoculated from  
450 cryopreserved (−80°C) stocks in modified Shieh-medium (46) and grown for 48 h at 25°C  
451 with 120 rpm agitation. After this, subcultures were made in modified Shieh-medium and  
452 grown for 24 h at 25°C with 120 rpm agitation. The optical density (OD) of the bacterial  
453 broth suspensions was measured spectrophotometrically at 595 nm and adjusted to  $5 \times 10^5$   
454 colony forming units (CFU) mL<sup>-1</sup> for phage exposures and  $5 \times 10^6$  CFU mL<sup>-1</sup> for virulence  
455 experiment (based on previously determined OD/CFU relationship). For other test, *F.*  
456 *columnare* isolates were cultured in TYES broth (47), washed in TYES broth by  
457 centrifugation at 5310 X g for 15 min at 4°C, and cultures spectrophotometrically adjusted to  
458 OD 0.6 at 520 nm (approximately  $10^8$  CFU mL<sup>-1</sup>).

459

460 Phage lysates were produced using “double layer agar” -method (48) as follows: Three mL of  
461 melted (47°C) top agar (0.5%) including 300 µL of 24-hour subculture of the host bacterium  
462 and 100 µL of phage (tenfold dilutions in Shieh medium) was poured on Shieh agar and  
463 grown for 48 h at 25 °C. Five mL of Shieh-medium was added on top of Shieh agar plates  
464 with confluent lysis and incubated at 7°C for 12-18 h in constant agitation (90 rpm). The  
465 lysates were collected, filtered (PES membrane, pore size 0.45 µm, Nalgene®), and stored at  
466 +7°C or at −80°C with 20 % glycerol. For phage exposure, phage lysates were diluted with  
467 Shieh medium to  $5 \times 10^5$  plaque forming units (PFU) mL<sup>-1</sup>.

468

469 *Phage exposure experiments and isolation of colonies*

470

471 Two phage-sensitive wild-type *F. columnare* isolates, the high-virulence FCO-F2 isolate  
472 (genetic group C) and the medium-virulence FCO-F9 isolate (genetic group G) (This article  
473 was submitted to an online preprint archive [36]), were each exposed to three phages in  
474 separate experiments with individual phages. Isolate FCO-F2 was exposed to phages FCOV-  
475 F2, FCOV-F5 and FCOV-F25, and isolate FCO-F9 to phages FCL-2, FCOV-F13 and FCOV-  
476 F45, in accordance with the host range of the phages. Cultures with only bacteria served as  
477 no-phage controls. The exposures were carried out in 20 mL of autoclaved fresh water (Lake  
478 Jyväsjärvi) in triplicate cultures under constant agitation (120 rpm) at 25°C for three days at a  
479 multiplicity of infection (MOI) at inoculation of 1 ( $1 \times 10^4$  CFU and PFU mL<sup>-1</sup>). The cultures  
480 were sampled every 24h for three days, by making a serial tenfold dilution of samples, and  
481 spreading on Shieh-agar plates. After up to 4 days of incubation at room temperature, CFUs  
482 and colony morphologies were determined from the plate cultures. Two to three colonies  
483 from each triplicate culture at each sampling point were picked, and pure-cultured directly on  
484 Shieh agar plates three times to get rid of any phage contamination. Colonies were then  
485 checked for phage resistance by spot assay on agar plates: bacterial laws on top agar were  
486 prepared as above and 10 µL of ten-fold diluted original phage lysates (used in initial  
487 exposures) were spotted on agar. After 48-h incubation at 25 °C, bacterial plates with no  
488 observed plaques or confluent lysis were considered as phage-resistant. Altogether 189  
489 colonies from phage-exposed and no-phage control exposures were isolated from plate  
490 cultures. From this collection, 20 phage-exposed and 4 no-phage control isolates were  
491 selected for further analysis (Table 1).

492

493 The phage-exposed and no-phage control isolates were named according to the latter part of  
494 the wild-type bacterial host, a letter R for phage-exposed and S for no-phage control isolate,  
495 plus a running number for the isolated colony. For example, F2R2 is the second selected

496 phage-exposed colony of the *F. columnare* wild-type isolate FCO-F2. Correspondingly, the  
497 second *F. columnare* isolate from no-phage control cultures was marked as F2S2. For  
498 simplicity, wild-type FCO-F2 and all its subsequent isolates from the phage and control  
499 exposures are commonly called F2-isolates in this paper. Correspondingly, wild-type FCO-  
500 F9 and its subsequent isolates are called F9-isolates.

501

#### 502 *Antibiotic sensitivity*

503

504 Changes in susceptibility of phage-exposed *F. columnare* isolates towards antibiotics was  
505 tested using the Kirby-Bauer disc diffusion method (49) on diluted Mueller-Hinton (50) agar  
506 medium supplemented with 5 % w/v fetal calf serum. A 40  $\mu$ L volume of each isolate  
507 suspension ( $10^9$  CFU mL<sup>-1</sup>) was added to 5 mL phosphate-buffered saline and poured onto  
508 the Mueller-Hinton agar plates. After removing excess bacterial suspension by pipetting, the  
509 antibiotic discs [oxolinic acid (2  $\mu$ g), florfenicol (30  $\mu$ g), sulfamethoxazol/trimethoprim (25  
510  $\mu$ g) and tetracycline (30  $\mu$ g)] were placed on the plates. The plates were then incubated for 3  
511 days at 25°C. After incubation, the inhibition zone around the antibiotic discs was measured.  
512 The susceptibility patterns of the selected phage-exposed and no-phage control *F. columnare*  
513 isolates to the antibiotics were compared to that of the parent wild-type isolates.

514

#### 515 *Motility/Colony spreading*

516

517 The effect of phage-exposure on bacterial motility was tested by comparing the colony  
518 spreading ability of phage-exposed and no-phage control isolates with that of their parent  
519 wild-type isolates. After spotting of 5  $\mu$ L of bacterial suspension ( $10^9$  CFU mL<sup>-1</sup>) on TYES  
520 agar (0.5% agar) plates supplemented with 0.1% baker's yeast and incubation for 3 days at

521 25°C, the colony diameter of each isolate was measured. Each isolate was tested in three  
522 replicates.

523

#### 524 *Adhesion and biofilm formation*

525

526 Changes in adherence or biofilm formation capacities between wild-type, phage-exposed and  
527 no-phage control *F. columnare* isolates were studied in flat-bottomed 96-well microtiter  
528 plates (Nunclon  $\Delta$  Surface, Nunc) (51). *F. columnare* cells grown on TYES agar were  
529 suspended in autoclaved fresh water (lake Littoistenjärvi) to a concentration of  $10^8$  CFU mL<sup>-1</sup>  
530 (OD<sub>520nm</sub>=0.6). For testing of bacterial adherence, a 100  $\mu$ L volume of the prepared bacterial  
531 suspensions were added in triplicate into wells of replicate microtiter plates and incubated  
532 statically for 1 h at 25°C. For testing of biofilm formation, a 100  $\mu$ L volume of TYES broth  
533 was added to wells containing 100  $\mu$ L of the prepared bacterial suspensions and allowed to  
534 incubate for 3 days. Autoclaved fresh water was used as negative control. After incubation,  
535 the contents were discarded and the wells were washed three times with sterile 0.5% NaCl to  
536 remove non-adherent cells and air dried. The wells were then stained with 0.1% crystal violet  
537 solution for 45 min and washed three times by submersion in a container of tap water and air  
538 dried. The crystal violet was solubilized with 96% ethanol for 15 min before measuring the  
539 absorbance (1 s) at 595 nm (Victor2, Wallac).

540

#### 541 *Protease activity*

542

543 Changes in protease activity was examined by spotting 1  $\mu$ L of bacterial TYES broth  
544 suspension ( $10^8$  CFU mL<sup>-1</sup>) of the wild-type isolates and each phage-exposed and no-phage  
545 control isolate on TYES agar (1.5% agar) supplemented with (w/v) elastin (0.1%), gelatin

546 (3%) and skim milk (5%) (caseinase production). The proteolytic activity of each isolate was  
547 observed by the presence of a clear zone surrounding the colony after incubation, and  
548 assessed by measuring the clear zone ratio (diameter of clear zone/diameter of the colony) of  
549 three replicate samples. In the absence of a clearing zone outside the colony, the clear zone  
550 ratio was defined as 1. The measurements were made after 5 (caseinase and gelatinase) or 10  
551 days (elastinase) of incubation at 25°C.

552

### 553 *Virulence*

554

555 Virulence of phage-exposed and no-phage control *F. columnare* isolates was tested on 1.94 g  
556 (average weight) rainbow trout fry and compared to the virulence of wild-type isolates.  
557 Fifteen fish per treatment, 20 in control treatment with no bacteria, were exposed individually  
558 in 500 mL of bore hole water (25°C) to cells of single bacterial isolates by constant  
559 immersion ( $5.0 \times 10^3$  CFU mL<sup>-1</sup>). Survival of the fish was monitored hourly during 24 h.  
560 Morbid fish that did not respond to stimuli were considered dead, removed from the  
561 experiment and put down by decapitation. At the end of the experiment, the fish having  
562 survived from the infection were put down using 0.008 % Benzocaine. Bacterial cultivations  
563 from gills of all the dead fish were made on Shieh agar supplemented with tobramycin (52) to  
564 confirm the presence/absence of the bacterium. Cumulative percent mortality and estimated  
565 survival time (Kaplan-Meier Survival Analysis), based on observed average survival time of  
566 fish after exposure to each isolate, were used as measures of virulence with more virulent  
567 isolates having a shorter estimated survival time.

568

569 Fish experiment was conducted according to the Finnish Act of Use of Animals for  
570 Experimental purposes, under permission ESAVI/8187/2018 granted for Lotta-Riina

571 Sundberg by the National Animal Experiment Board at the Regional State Administrative  
572 Agency for Southern Finland.

573

574 *Whole genome sequencing*

575

576 Genomes of the wild-type FCO-F2 and FCO-F9 *F. columnare* and selected (Table 1) 20  
577 phage-exposed and four no-phage control isolates were sequenced using Illumina HiSeq  
578 platform (Institute of Molecular Medicine Finland). The Illumina data reads of FCO-F9 and  
579 its phage-exposed and no-phage control isolates were mapped to a reference genome of *F.*  
580 *columnare* isolate B185 (53) using Geneious software version 11.1.5 (Biomatters Ltd.).  
581 Genome of the wild-type FCO-F2 isolate was sequenced also using PacBio (BGI, China).  
582 PacBio data of FCO-F2 was assembled using > 8kbp reads with Flye (v. 2.7, four iterations)  
583 and > 6 kbp with Canu (v. 1.9). These multi-contig assemblies were then combined using  
584 Quickmerge (v. 0.3) to produce one 3 221 312 bp contig. This contig was polished with  
585 Illumina HiSeq reads using Pilon (v. 1.23), with pre-processing done using Trimmomatic (v.  
586 0.39), bowtie2 (2.3.5.1) and Samtools (v. 1.9). The quality of the polished contig was  
587 quantified using Busco (v. 4.0.2), which reported 100% completeness of genome against the  
588 bacteria\_odb10 reference set. The genome was annotated using the NCBI Prokaryotic  
589 Genome Annotation Pipeline (PGAP) (54, 55), and used as reference genome for mapping of  
590 F2 phage-exposed and no-phage control isolates.

591

592 *Statistical analyses*

593

594 IBM SPSS Statistics version 24 was used for statistical analysis of the data. A one-way  
595 analysis of variance (ANOVA) was used to compare means from phenotypic analyses



596 between experimental groups (phage-exposed isolates and no-phage control isolates) and  
597 parent wild-type isolates. If needed, lg10, exponential or square root transformations were  
598 made for the data to fulfil the homogeneity of variances assumption. If the homogeneity of  
599 variances could not be met by transformations, the data were analysed using non-parametric  
600 Kruskal-Wallis and Mann-Whitney tests. In case of elastinase and casienase activity, and  
601 biofilm formation, the isolates with no activity/biofilm forming capacity were excluded from  
602 the ANOVA LSD multiple comparison analyses. Kaplan-Meier Survival Analysis was used  
603 for analysis of virulence data.

604

#### 605 *Data availability*

606

607 The whole genome sequences of all the isolates were submitted to GenBank under accession  
608 numbers presented in Table 6.

609

#### 610 **Acknowledgements**

611

612 We acknowledge funding from Academy of Finland (grant #314939) and Jane and Aatos  
613 Erkko Foundation. This work resulted from the BONUS FLAVOPHAGE project supported  
614 by BONUS (Art 185), funded jointly by the EU and Academy of Finland.

615

#### 616 **References**

617

- 618 1. Cabello FC, Godfrey HP, Tomova A, Ivanova L, Dölz H, Millanao A, Buschmann  
619 AH. 2013. Antimicrobial use in aquaculture re-examined: its relevance to

- 620 antimicrobial resistance and to animal and human health. *Environ Microbiol* 15:1917–  
621 1942.
- 622 2. Watts JEM, Schreier HJ, Lanska L, Hale MS. 2017. The rising tide of antimicrobial  
623 resistance in aquaculture: sources, sinks and solutions. *Mar Drugs* 15:158.
- 624 3. Gudding R, Lillehaug A, Evensen Ø (ed). 2014. Fish vaccination. Wiley Blackwell,  
625 UK.
- 626 4. Suomalainen LR, Tirola MA, Valtonen ET. 2005. Effect of *Pseudomonas* sp. MT5  
627 baths on *Flavobacterium columnare* infection of rainbow trout and on microbial  
628 diversity on fish skin and gills. *Dis Aquat Org* 63:61–68.
- 629 5. Pulkkinen K, Suomalainen LR, Rintamäki-Kinnunen P, Read A, Ebert D, Valtonen  
630 ET. 2010. Intensive fish farming and the evolution of pathogen virulence: the case of  
631 columnaris disease in Finland. *Proc Royal Soc B* 277:593-600.
- 632 6. Schmidt AS, Bruun MS, Dalsgaard I, Pedersen K, Larsen JL. 2000. Occurrence of  
633 antimicrobial resistance in fish-pathogenic and environmental bacteria associated with  
634 four danish rainbow trout farms. *Appl Environ Microbiol* 66:4908-4915.
- 635 7. Hesami S, Parkman J, MacInnes JI, Gray JT, Gyles CL, Lumsden JS. 2010.  
636 Antimicrobial susceptibility of *Flavobacterium psychrophilum* Isolates from Ontario.  
637 *J Aquat Anim Health* 22:39–49.
- 638 8. Molina-Aja A, García-Gasca A, Abreu-Grobois A, Bolán-Mejía C, Roque A, Gomez-  
639 Gil B. 2002. Plasmid profiling and antibiotic resistance of *Vibrio* strains isolated from  
640 cultured penaeid shrimp. *FEMS Microbiol Lett* 2013:7-12.
- 641 9. Mohamad N, Amal MNA, Saad MZ, Yasin ISM, Zulkiply NA, Mustafa M,  
642 Nasruddin NS. 2019. Virulence-associated genes and antibiotic resistance patterns of  
643 *Vibrio* spp. isolated from cultured marine fishes in Malaysia. *BMC Vet Res* 15:176.

- 644 10. Declercq AM, Boyen E, Van den Broeck W, Bossier P, Karsi A, Haeseborouck F,  
645 Decostere A (2013). Antibiotic susceptibility pattern of *Flavobacterium columnare*  
646 isolates collected worldwide from 17 fish species. J Fish Dis 3:45-55.
- 647 11. Loc-Carrillo C, Abedon ST. 2011. Pros and cons of phage therapy. Bacteriophage  
648 1:111-114.
- 649 12. Nakai T, Sugimoto R, Park KH, Matsuoka S, Mori K, Nishioka T, Maruyama K.  
650 1999. Protective effects of bacteriophage on experimental *Lactococcus garviae*  
651 infection in yellowtail. Dis Aquat Org 37:33-41.
- 652 13. Park SC, Nakai T. 2003. Bacteriophage control of *Pseudomonas plecoglossicida*  
653 infection in ayu *Plecoglossus altivelis*. Dis Aquat Org 53:33-39.
- 654 14. Higuera G, Bastías R, Tsersvadze G, Romero J, Espejo RT. 2013. Recently  
655 discovered *Vibrio anguillarum* phages can protect against experimentally induced  
656 vibriosis in Atlantic salmon, *Salmo salar*. Aquaculture 392-395:128-130.
- 657 15. Castillo D, Higuera G, Villa M, Middelboe M, Dalsgaard I, Madsen L, Espejo RT.  
658 2012. Diversity of *Flavobacterium psychrophilum* and the potential use of its phages  
659 for protection against bacterial cold-water disease in salmonids. J Fish Dis 35:193-  
660 201.
- 661 16. Laanto E, Bamford JKH, Ravantti J, Sundberg L-R. 2015. The use of phage FCL-2 as  
662 an alternative to chemotherapy against columnaris disease in aquaculture. Front  
663 Microbiol 6:829.
- 664 17. Almeida GMF, Laanto E, Ashrafi R, Sundberg LR. 2019. Bacteriophage adherence to  
665 mucus mediates preventive protection against pathogenic bacteria. mBio 10:e01984-  
666 19.
- 667 18. Tan D, Svenningsen SL, Middelboe M. 2015. Quorum sensing determines the choice  
668 of anti-phage defense strategy in *Vibrio anguillarum*. mBIO 6:00627-15

- 669 19. Azam AH, Tanji Y. 2019. Bacteriophage-host arm race: an update on the mechanism  
670 of phage resistance in bacteria and revenge of the phage with the perspective for  
671 phage therapy. *Appl Microbiol Biotechnol* 103:2121-2131.
- 672 20. Cohen D, Melamed S, Millman A, Shulman G, Oppenheimer-Shaanan Y, Kacen A,  
673 Doron S, Amitai G, Sorek R. 2019. Cyclic GMP–AMP signalling protects bacteria  
674 against viral infection. *Nature* 574:691-695.
- 675 21. Léon M, Bastias R. 2015. Virulence reduction in bacteriophage resistant bacteria.  
676 *Front Microbiol* 6:343.
- 677 22. Park SC, Shimamura I, Fukunaga M, Mori KI, Nakai T. 2000. Isolation of  
678 bacteriophages specific for a fish pathogen, *Pseudomonas plecoglossicida*, as a  
679 candidate for disease control. *Appl Environ Microbiol* 66:1416-1422.
- 680 23. Castillo D, Christiansen RH, Dalsgaard I, Madsen L, Middelboe M. 2015.  
681 Bacteriophage resistance mechanisms in the fish pathogen *Flavobacterium*  
682 *psychrophilum*: Linking genomic mutations to changes in bacterial virulence factors.  
683 *Appl Environ Microbiol* 18:1157-1167.
- 684 24. Castillo D, Rørbo N, Jørgensen J, Lange J, Tan D, Kalatzis PG, Lo Svenningsen S,  
685 Middelboe M. 2019. Phage defence mechanisms and their genomic and phenotypic  
686 implications in the fish pathogen *Vibrio Anguillarum*. *FEMS Microbiol Ecol*  
687 95:fiz004
- 688 25. Kunttu HMT, Suomalainen LR, Jokinen EI, Valtonen ET. 2009. *Flavobacterium*  
689 *columnare* colony types: Connection to adhesion and virulence? *Microb Pathog* 46:  
690 21-27.
- 691 26. Kunttu HMT, Jokinen EI, Sundberg L-R, Valtonen ET. 2011. Virulent and  
692 nonvirulent *Flavobacterium columnare* colony morphologies: Characterization of

- 693 chondroitin AC lyase activity and adhesion to polystyrene. *J Appl Microbiol*  
694 111:1319-1326.
- 695 27. Laanto E, Bamford JKH, Laakso J, Sundberg LR. 2012. Phage driven loss of  
696 virulence in a fish pathogenic bacterium. *PLOS ONE* 7:e53157.
- 697 28. Li N, Zhu Y, LaFrentz BR, Evenhuis JP, Hunnicut DW, Conrad RA, Barbier P,  
698 Gullstrand GW, Roets JE, Powers JL, Kulkarni SS, Erbes DH, Garcia JC, Nie P,  
699 McBride MJ. 2017. The Type IX secretion system is required for virulence of the fish  
700 pathogen *Flavobacterium columnare*. *Appl Environ Microbiol* 83:e017769-17.
- 701 29. McBride MJ, Nakane D. 2015. *Flavobacterium* gliding motility and the type IX  
702 secretion system. *Curr Opin Microbiol* 28:72-77.
- 703 30. Braun TF, Khubbar MK, Saffarini DA, McBride MJ. 2005. *Flavobacterium*  
704 *johnsoniae* gliding motility genes identified by mariner mutagenesis. *J Bacteriol*  
705 187:6943-6952.
- 706 31. Shrivastava A, Johnston JJ, van Baaren JM, McBride MJ. 2013. *Flavobacterium*  
707 *johnsoniae* GldK, GldL, GldM, and SprA are required for secretion of the cell surface  
708 gliding motility adhesins SprB and RemA. *J Bacteriol* 195:3201-3212.
- 709 32. Johnston JJ, Shrivastava A, McBride MJ. 2018. Untangling *Flavobacterium*  
710 *johnsoniae* gliding motility and protein secretion. *J Bacteriol* 200:e00362-17.
- 711 33. Hunnicutt DW, Kempf MJ, McBride MJ. 2002. Mutations in *Flavobacterium*  
712 *johnsoniae* *gldF* and *gldG* disrupt gliding motility and interfere with membrane  
713 localization of GldA. *J Bacteriol* 184:2370-2378.
- 714 34. Penttinen R, Hoikkala V, Sundberg LR. 2018. Gliding motility and expression of  
715 motility related genes in spreading and non-spreading colonies of *Flavobacterium*  
716 *columnare*. *Front Microbiol* 9:525.

- 717 35. Labrie S, Samson JE, Moineau S. 2010. Bacteriophage resistance mechanisms. Nat  
718 Rev Microbiol 8:317-327.
- 719 36. Runtuvuori-Salmela A, Kunttu HMT, Laanto E, Almeida GMF, Mäkelä K,  
720 Middelboe M, Sundberg LR. (2020). Prevalence of genetically similar  
721 *Flavobacterium columnare* phages across aquaculture environments reveals a strong  
722 potential for pathogen control. bioRxiv  
723 <https://biorxiv.org/cgi/content/short/2020.09.23.309583v1>
- 724 37. Porter NT, Hryckowian AJ, Merrill BD, Fuentes JJ, Gardner JO, Glowacki RWP,  
725 Singh S, Crawford RD, Snitkin ES, Sonnenburg JL, Martens EC. 2020. Phase-  
726 variable capsular polysaccharides modify bacteriophage susceptibility in *Bacteroides*  
727 *thetaiotaomicron*. Nat Microbiol 5:1170-1181.
- 728 38. Laanto E, Hoikkala V, Ravantti J, Sundberg LR. 2017. Long-term coevolution of  
729 host-parasite interaction in the natural environment. Nat Commun 8:111.
- 730 39. Hoikkala V, Ravantti J, Díez-Villaseñor C, Tirola M, Conrad RA, McBride MJ,  
731 Sundberg LR. 2020. Cooperation between CRISPR-Cas types enables adaptation in  
732 an RNA-targeting system. bioRxiv <https://doi.org/10.1101/2020.02.20.957498>
- 733 40. Kumru S, Tekedar HC, Gulsoy N, Waldbieser GC, Lawrence ML, Karsi A. 2017.  
734 Comparative analysis of the *Flavobacterium columnare* Genomovar I and II genomes.  
735 Front Microbiol 8:1375.
- 736 41. Flemming HC, Wingender J, Szewzyk U, Steinberg P, Rice SA, Kjelleberg S. 2016.  
737 Biofilms: an emergent form of bacterial life. Nat Rev 14:563.
- 738 42. Cai W, De La Fuente L, Arias CR. (2013). Biofilm formation by the fish pathogen  
739 *Flavobacterium columnare*: Development and parameters affecting surface  
740 attachment. Appl Environ Microbiol 79:5633-5642.

- 741 43. Decostere A, Haesebrouck F, Turnbull JF, Charlier G. (1999). Influence of water  
742 quality and temperature on adhesion of high and low virulence *Flavobacterium*  
743 *columnare* strains to isolated gill arches. J Fish Dis 22:1-11.
- 744 44. Allen RC, Pfrunder-Cardozo KR, Meinel D, Egli A, Hall AR. 2017. Associations  
745 among antibiotic and phage resistance phenotypes in natural and clinical *Escherichia*  
746 *coli* isolates. mBio 8:e01341-17.
- 747 45. Zhang QG, Buckling A. 2012. Phages limit the evolution of bacterial antibiotic  
748 resistance in experimental microcosms. Evol Appl 5:575-582.
- 749 46. Song YL, Fryer JL, Rohovec JS. 1988. Comparison of six media for the cultivation of  
750 *Flexibacter columnaris*. Fish Pathol 23:91-94.
- 751 47. Holt RA, Rohovec JS, Fryer JL. 1993. Bacterial cold-water disease, p 3-23. In Inglis  
752 V, Roberts RJ, Bromage NR (ed), Bacterial Diseases of Fish. Blackwell Scientific  
753 Publication Oxford, UK.
- 754 48. Adams MH. 1959. Bacteriophages. Interscience Publishers, Inc., New York.
- 755 49. Bauer AW, Kirby WMM, Sherris JC, Turck M. 1966. Antibiotic Susceptibility testing  
756 by a standardized single disk method. Am J Clin Pathol 45:493-496
- 757 50. CLSI. 2006. Methods for antimicrobial disk susceptibility testing of bacteria isolated  
758 from aquatic animals; Approved guideline. CLSI document M42-A. Wayne, PA:  
759 Clinical and Laboratory Standards Institute.
- 760 51. Högfors-Rönholm E, Norrgård J, Wiklund T. 2015. Adhesion of smooth and rough  
761 phenotypes of *Flavobacterium psychrophilum* to polystyrene surfaces. J Fish Dis  
762 38:429-437.
- 763 52. Decostere A, Haesebrouck F, Devriese LA. 1997. Shieh medium supplemented with  
764 tobramycin for selective isolation of *Flavobacterium columnare* (*Flexibacter*  
765 *columnaris*) from diseased fish. J Clin Microbiol 35:322-324.

- 766 53. Ravantti JJ, Laanto E, Papponen P, Sundberg LR. 2019. Complete genome sequence  
767 of fish pathogen *Flavobacterium columnare* strain B185, originating from Finland.  
768 Microbiol Resour Announc 8:e01285-19.
- 769 54. Tatusova T, DiCuccio M, Badretdin A, Chetvernin V, Nawrocki EP, Zaslavsky L,  
770 Lomsadze A, Pruitt KD, Borodovsky M, Ostell J. 2016. NCBI prokaryotic genome  
771 annotation pipeline. Nucleic Acids Res 44:6614-24.
- 772 55. Haft DH, DiCuccio M, Badretdin A, Brover V, Chetvernin V, O'Neill K, Li W,  
773 Chitsaz F, Derbyshire MK, Gonzales NR, Gwadz M, Lu F, Marchler GH, Song JS,  
774 Thanki N, Yamashita RA, Zheng C, Thibaud-Nissen F, Geer LY, Marchler-Bauer A,  
775 Pruitt KD. 2018. RefSeq: an update on prokaryotic genome annotation and curation.  
776 Nucleic Acids Res 46(D1):D851-D860.  
777



778 **Figures**  
779

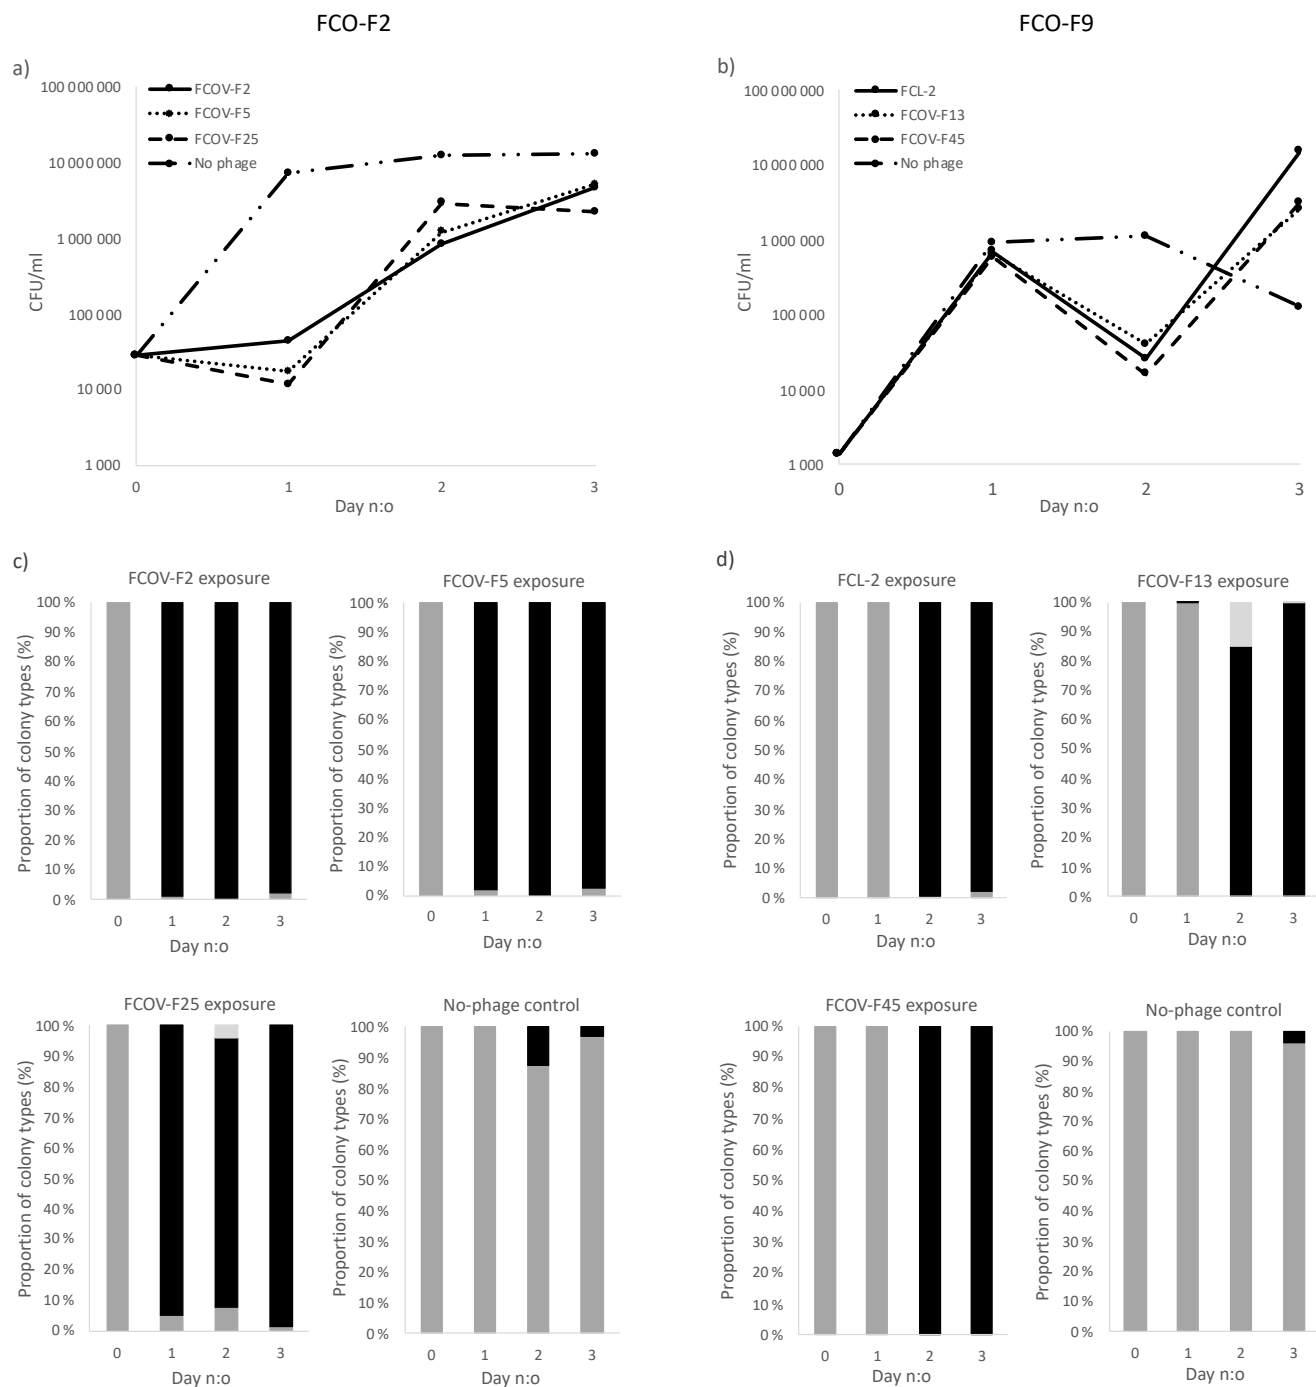

780

781 **Figure 1.** Bacterial growth (a and b), determined as colony forming units mL<sup>-1</sup>, and  
 782 proportion (%) of different colony types (c and d) of *Flavobacterium columnare* isolates  
 783 FCO-F2 (a and c) and FCO-F9 (b and d) during the 3-day exposure to phages FCOV-F2,  
 784 FCOV-F5, FCOV-F25, FCL-2, FCOV-F13 and FCOV-F45. Dark grey bar: proportion of  
 785 isolates forming rhizoid colony morphology, black bar: proportion of isolates forming rough  
 786 colony morphology, light grey bar: proportion of isolates forming soft colony morphology.

787  
788  
789  
790  
791  
792  
793  
794  
795  
796  
797  
798  
799  
800  
801  
802  
803  
804  
805  
806  
807  
808  
809

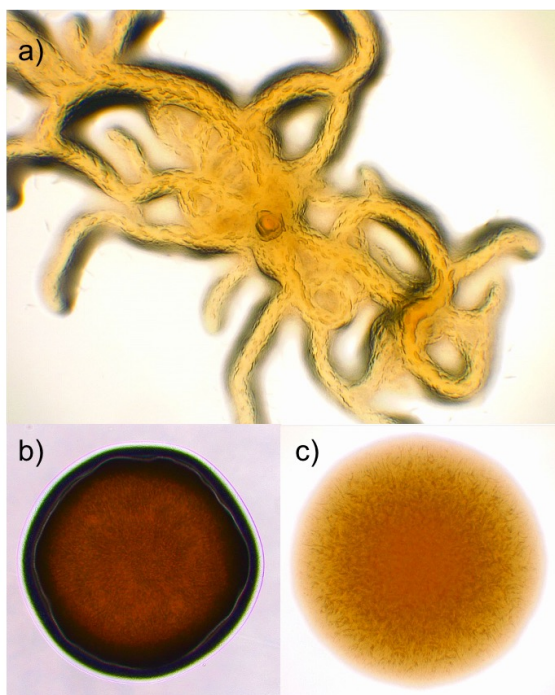

**Figure 2.** Different colony morphologies formed by *Flavobacterium columnare* on Shieh-agar plates after phage exposure: a) rhizoid, b) rough and c) soft.

810  
811  
812  
813  
814  
815  
816  
817  
818  
819  
820  
821  
822  
823  
824  
825  
826  
827  
828  
829  
830  
831  
832

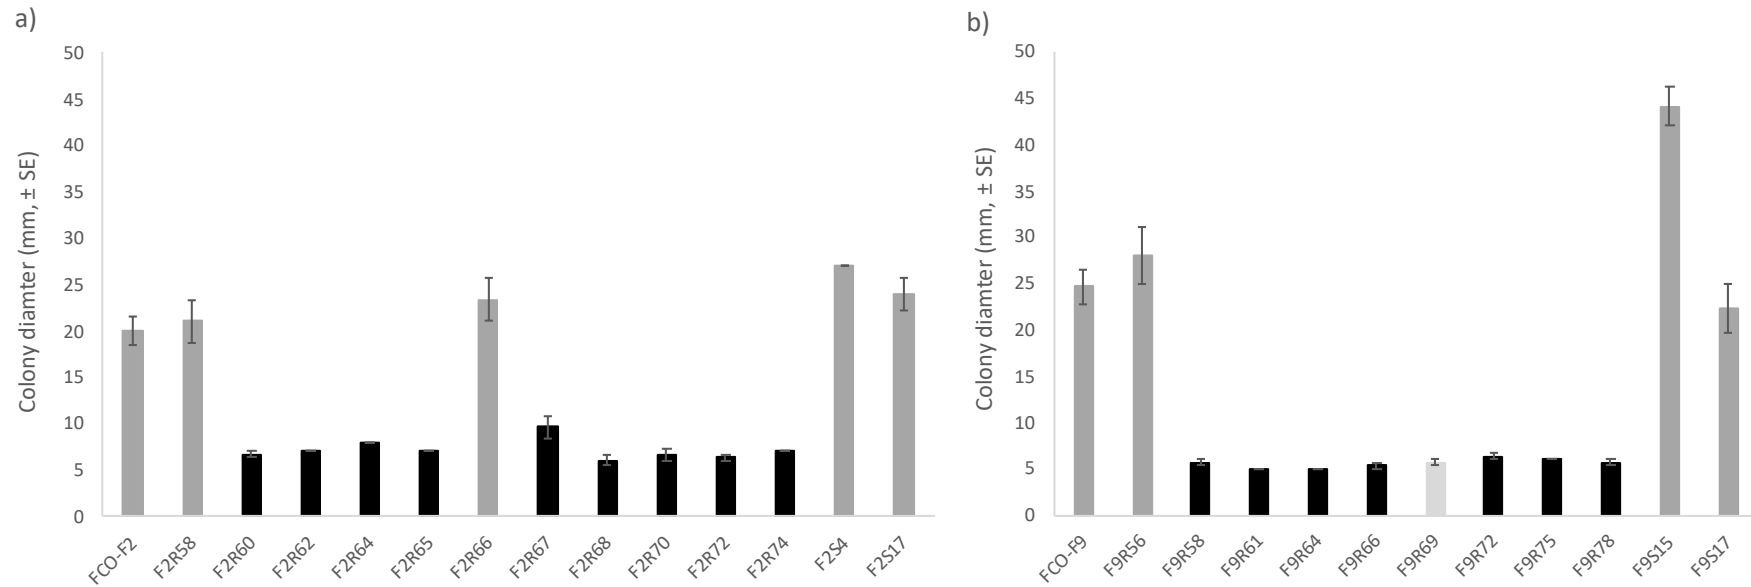

**Figure 3.** Motility of *Flavobacterium columnare* wild-type a) FCO-F2 and b) FCO-F9 isolates, and their phage-exposed (F2R- and F9R-) and no-phage control (F2S- and F9S-) isolates expressed as colony diameter (mm, ±SE) on TYES agar. All the phage-sensitive rhizoid colonies forming isolates (dark grey bar) were significantly more motile than phage-resistant rough (black bar) or soft (light grey bar) morphology isolates (F2-isolates:  $P < 0.001$ , Oneway ANOVA, LG10 transformation; F9-isolates:  $P \leq 0.004$ , Mann-Whitney test).

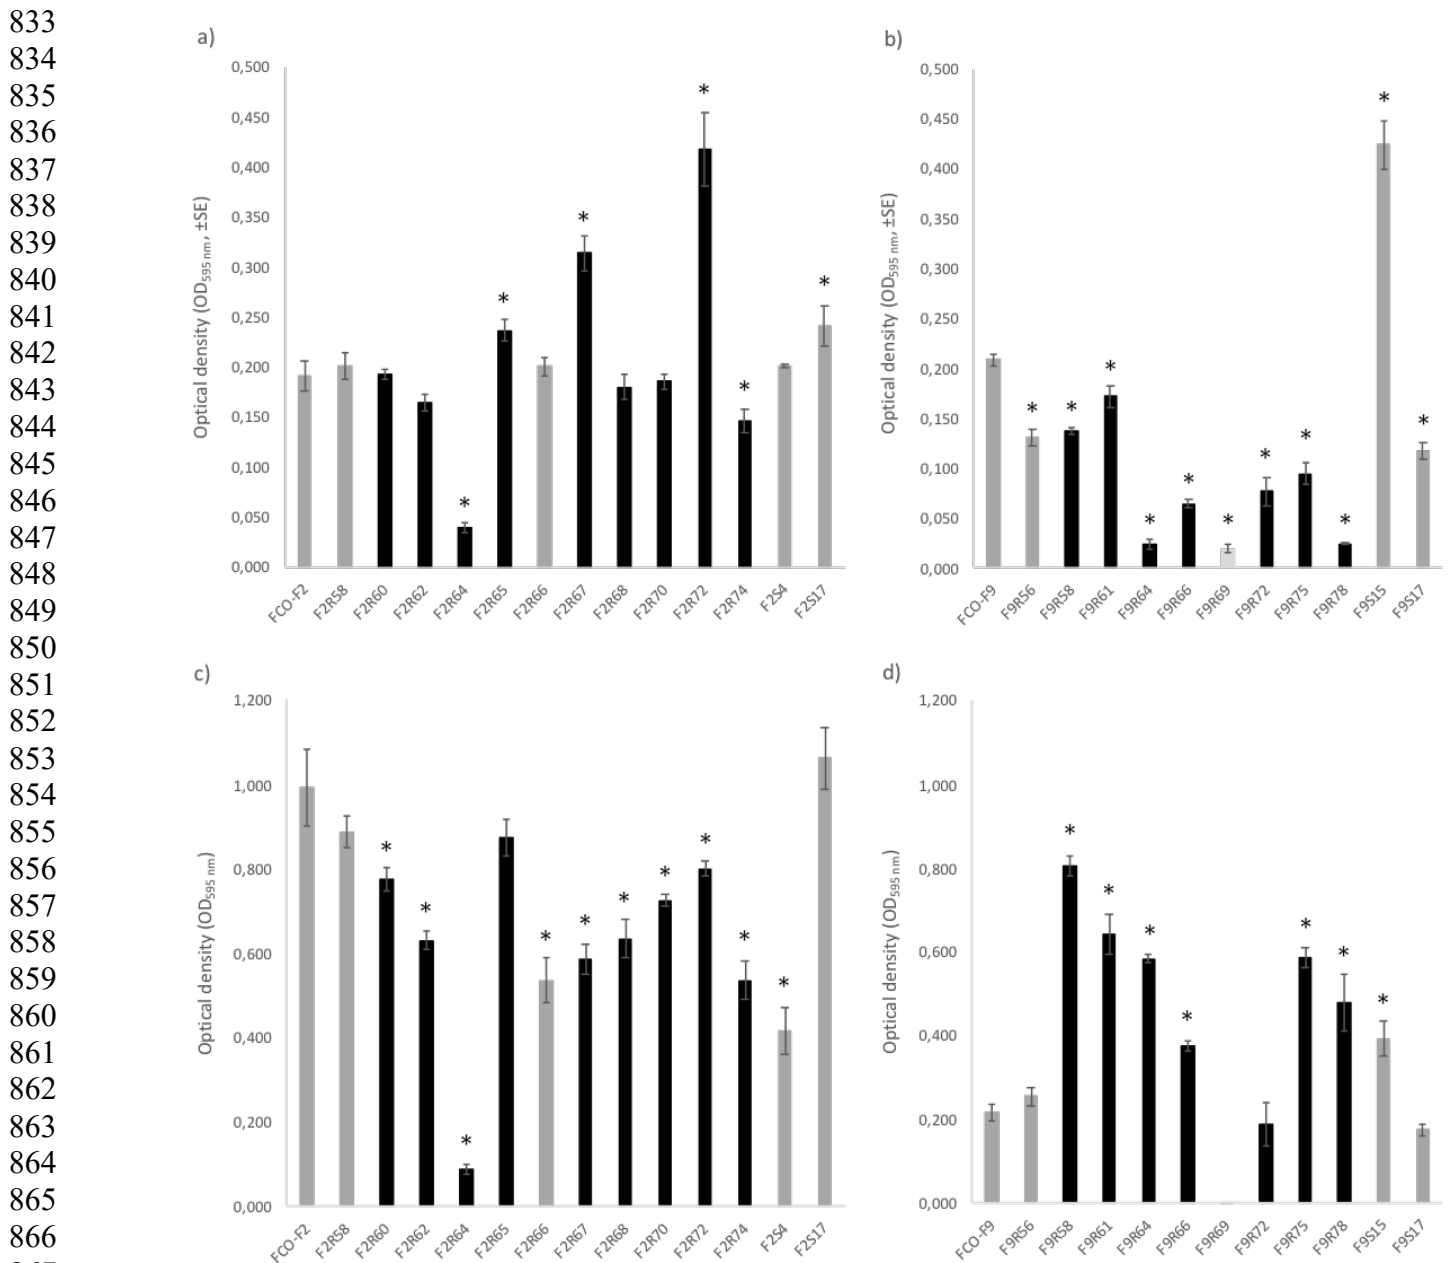

869 **Figure 4.** Adherence (a and b) and biofilm forming (c and d) capacity of *Flavobacterium*  
870 *columnare* wild-type FCO-F2 (a and c) and FCO-F9 (b and d) isolates, and their phage-  
871 exposed (F2R- and F9R-) and no-phage control (F2S- and F9S-) isolates on a polystyrene  
872 surface measured as optical density (OD<sub>595 nm</sub>, ±SE). Asterisks indicate the statistically  
873 significant difference (P < 0.05) compared to the parent wild-type isolate. F9S69 did not form  
874 any biofilm and was thus excluded from the statistical analyses. Dark grey bars: phage-  
875 sensitive isolates forming rhizoid colony morphology, black bars: phage-resistant isolates  
876 forming rough morphology, light grey bar: phage-resistant isolate forming soft morphology.  
877

878  
879  
880  
881  
882  
883  
884  
885  
886  
887  
888  
889  
890  
891  
892  
893  
894  
895  
896  
897  
898  
899  
900  
901  
902  
903  
904  
905  
906  
907  
908  
909  
910  
911  
912

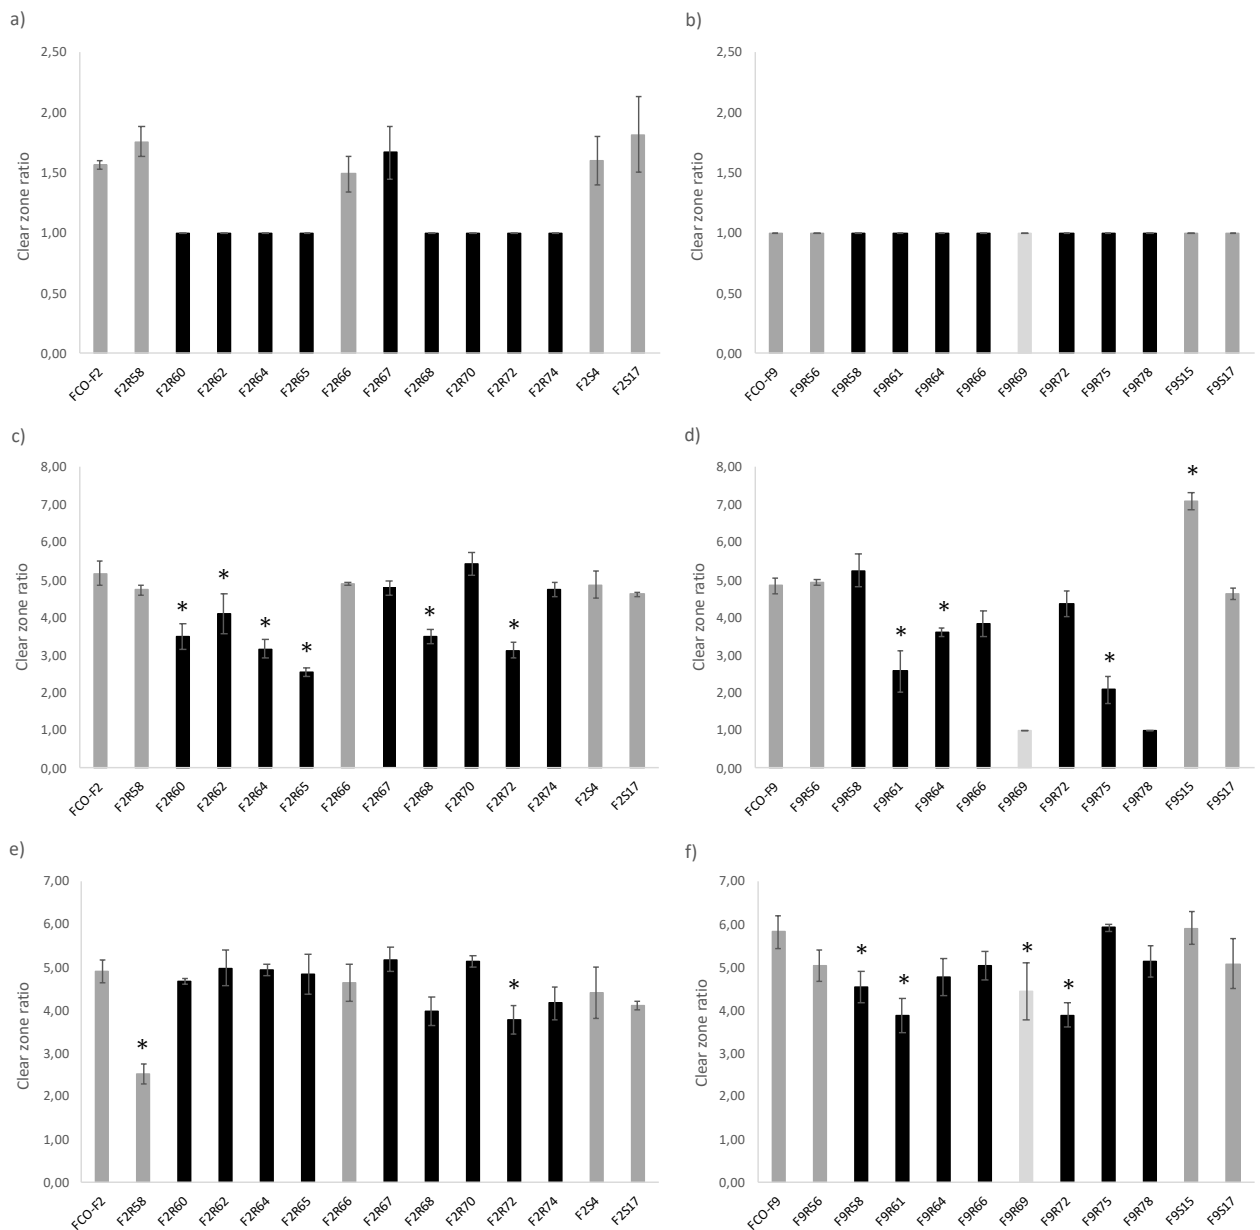

913 **Figure 5.** Protease (elastinase: a and b, gelatinase: c and d, and caseinase e and f) activity of  
914 the *Flavobacterium columnare* FCO-F2 (a, c and e) and FCO-F9 (b, d and f) isolates, and  
915 their phage-exposed (F2R- and F9R-) and no-phage control (F2S- and F9S-) isolates. The  
916 activity was measured as the clear zone ratio (clear zone diameter/colony diameter,  $\pm$ SE) on  
917 TYES agar supplemented with elastin, gelatin and skim milk (caseinase). The asterisk  
918 indicates significant reduction in protease activity ( $P < 0.05$ ) compared to the parent wild-  
919 type isolate. A clear zone ratio 1 indicates no protease activity. Isolates with no activity were  
920 excluded from the statistical analyses. Dark grey bars: phage-sensitive isolates forming  
921 rhizoid colony morphology, black bars: phage-resistant isolates forming rough morphology,  
922 light grey bar: phage-resistant isolate forming soft morphology.

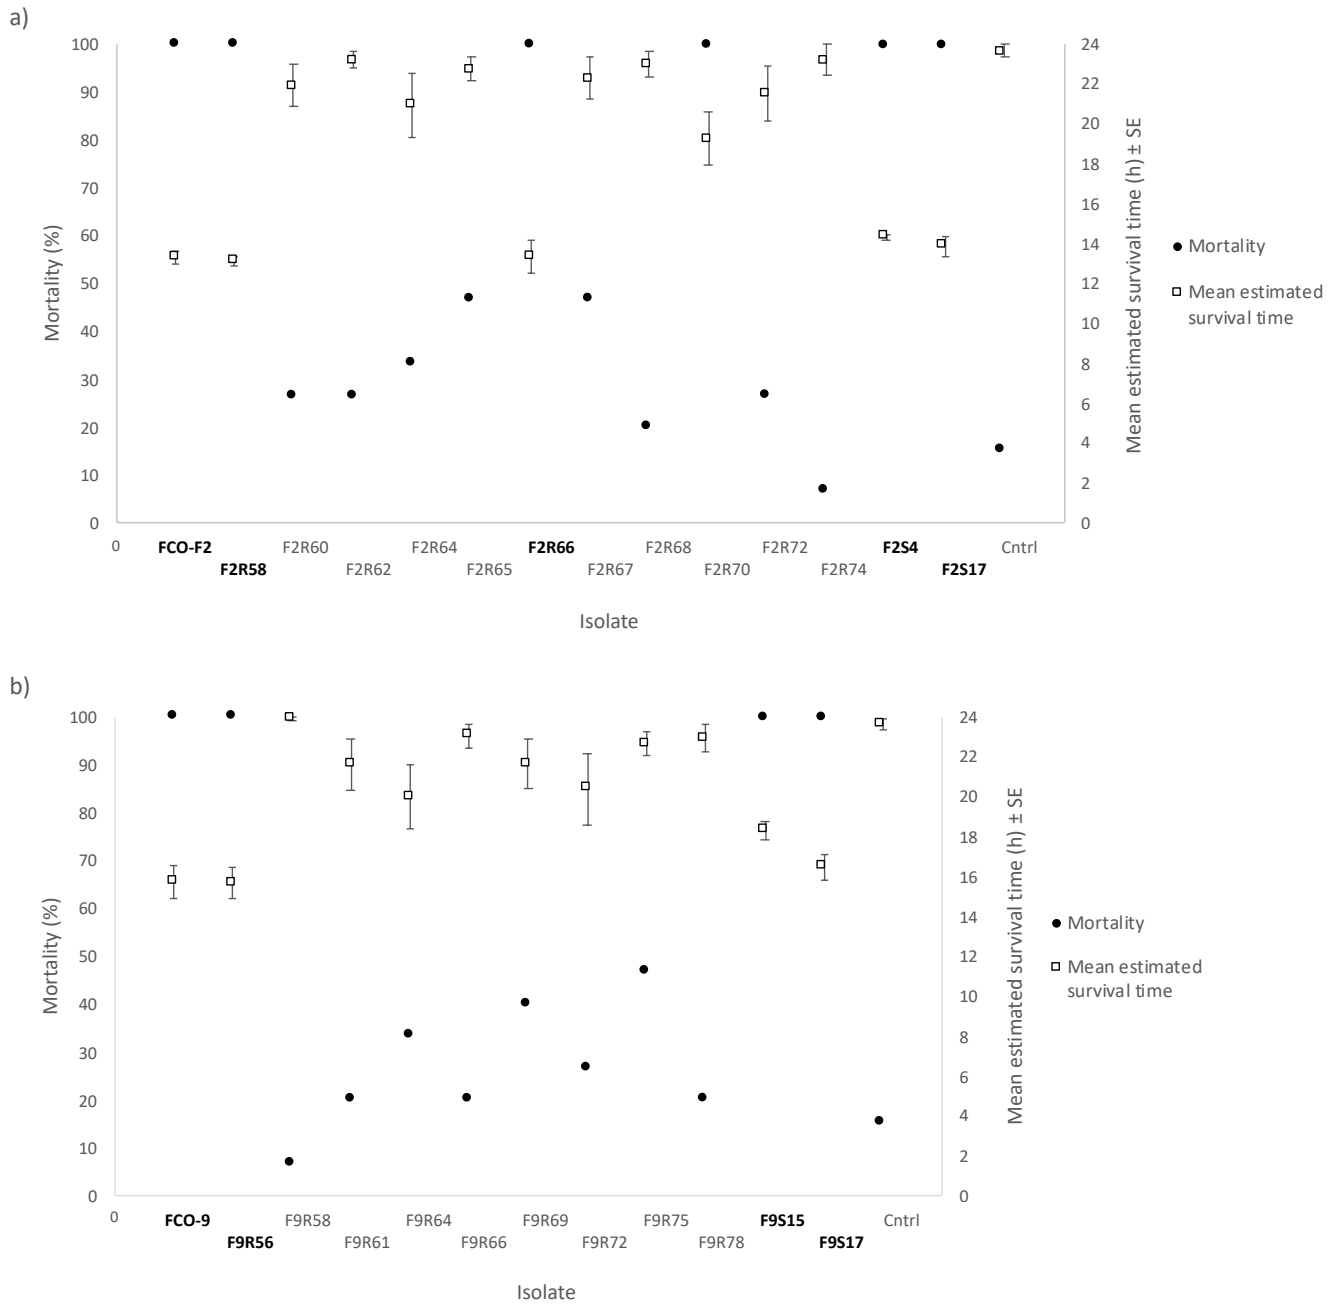

923

924 **Figure 6.** Mortality percent and estimated survival time ( $\pm$  SE) of rainbow trout  
 925 (*Oncorhynchus mykiss*) during 24-h experimental infection with wild-type *Flavobacterium*  
 926 *columnare* FCO-F2 (a) and FCO-F9 (b), and their phage-exposed (F2R- and F9R-) and no-  
 927 phage control (F2S- and F9S-) isolates. Phage-sensitive rhizoid colonies forming isolates are  
 928 written bold. Cntrl = control with no bacterial infection.  
 929

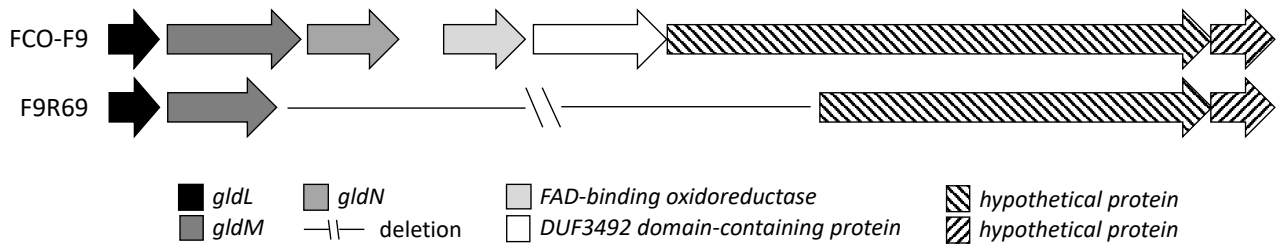

930

931

932

933

934

935

936

**Figure 7.** Deletion of genomic region covering 4 701 bp in FCOV-F13 exposed, soft colonies forming, phage-resistant *Flavobacterium columnare* isolate F9R69.



937 **Tables**  
938

939 **Table 1.** Experimental setup of phage exposure of two phage-sensitive wild-type *Flavobacterium columnare* isolates FCO-F2 (high-virulence,  
 940 genotype C; exposed for phages FCOV-F2, FCOV-F5 and FCOV-F25) and FCO-F9 (medium-virulence, genotype G; exposed for phages FCL-  
 941 2, FCOV-F13 and FCOV-F45), and colony morphologies and phage susceptibilities of the 20 phage-exposed (F2R- and F9R-) and 4 no-phage  
 942 control isolates (F2S- and F9S-) obtained from the exposure cultures. The isolates are shown according to the phage they were exposed to. The  
 943 susceptibility of the isolates to phages used in exposures: + = sensitive, - = resistant, ± = sensitivity decreased compared to the parent wild-type  
 944 isolate, i = inhibition of bacterial growth, considered as phage resistance, ND = not determined.  
 945

| 946 Wild-type isolate | 947 Phage     | 948 Phage-exposed isolate | 949 No-phage control isolate | 950 Colony morphology of the isolate | 951 Phage susceptibility of the isolate |             |              |           |              |             |
|-----------------------|---------------|---------------------------|------------------------------|--------------------------------------|-----------------------------------------|-------------|--------------|-----------|--------------|-------------|
|                       |               |                           |                              |                                      | 952 FCOV-F2                             | 953 FCOV-F5 | 954 FCOV-F25 | 955 FCL-2 | 956 FCOV-F13 | 957 FCO-F45 |
| 958 FCO-F2            |               |                           |                              | 959 rhizoid                          | +                                       | +           | +            | ND        | ND           | ND          |
| 960                   | 961 FCOV-F2   | 962 F2R58                 |                              | 963 rhizoid                          | ±                                       | ±           | ±            | ND        | ND           | ND          |
| 964                   |               | 965 F2R60                 |                              | 966 rough                            | -                                       | -           | -            | ND        | ND           | ND          |
| 967                   |               | 968 F2R62                 |                              | 969 rough                            | -                                       | -           | -            | ND        | ND           | ND          |
| 970                   | 971 FCOV-F5   | 972 F2R64                 |                              | 973 rough                            | -                                       | -           | -            | ND        | ND           | ND          |
| 974                   |               | 975 F2R65                 |                              | 976 rough                            | -                                       | -           | -            | ND        | ND           | ND          |
| 977                   |               | 978 F2R66                 |                              | 979 rhizoid                          | ±                                       | ±           | ±            | ND        | ND           | ND          |
| 980                   |               | 981 F2R67                 |                              | 982 rough                            | -                                       | -           | -            | ND        | ND           | ND          |
| 983                   |               | 984 F2R68                 |                              | 985 rough                            | -                                       | -           | -            | ND        | ND           | ND          |
| 986                   | 987 FCOV-F25  | 988 F2R70                 |                              | 989 rough                            | i                                       | i           | i            | ND        | ND           | ND          |
| 990                   |               | 991 F2R72                 |                              | 992 rough                            | -                                       | -           | -            | ND        | ND           | ND          |
| 993                   |               | 994 F2R74                 |                              | 995 rough                            | -                                       | -           | -            | ND        | ND           | ND          |
| 996                   | 997 No phage  |                           | 998 F2S4                     | 999 rhizoid                          | +                                       | +           | +            | ND        | ND           | ND          |
| 1000                  |               |                           | 1001 F2S17                   | 1002 rhizoid                         | +                                       | +           | +            | ND        | ND           | ND          |
| 1003                  | 1004 FCO-F9   |                           |                              | 1005 rhizoid                         | ND                                      | ND          | ND           | +         | +            | +           |
| 1006                  |               |                           |                              | 1007 rhizoid                         | ND                                      | ND          | ND           | ±         | ±            | ±           |
| 1008                  | 1009 FCL-2    | 1010 F9R56                |                              | 1011 rough                           | ND                                      | ND          | ND           | i         | i            | i           |
| 1012                  |               | 1013 F9R58                |                              | 1014 rough                           | ND                                      | ND          | ND           | i         | i            | i           |
| 1015                  |               | 1016 F9R61                |                              | 1017 rough                           | ND                                      | ND          | ND           | i         | i            | i           |
| 1018                  | 1019 FCOV-F13 | 1020 F9R64                |                              | 1021 rough                           | ND                                      | ND          | ND           | -         | -            | -           |
| 1022                  |               | 1023 F9R66                |                              | 1024 rough                           | ND                                      | ND          | ND           | i         | i            | i           |
| 1025                  |               | 1026 F9R69                |                              | 1027 soft                            | ND                                      | ND          | ND           | i         | i            | i           |
| 1028                  | 1029 FCOV-F45 | 1030 F9R72                |                              | 1031 rough                           | ND                                      | ND          | ND           | i         | i            | i           |
| 1032                  |               | 1033 F9R75                |                              | 1034 rough                           | ND                                      | ND          | ND           | i         | i            | -           |
| 1035                  |               | 1036 F9R78                |                              | 1037 rough                           | ND                                      | ND          | ND           | -         | -            | -           |
| 1038                  | 1039 No phage |                           | 1040 F9S15                   | 1041 rhizoid                         | ND                                      | ND          | ND           | +         | +            | +           |
| 1042                  |               |                           | 1043 F9S17                   | 1044 rhizoid                         | ND                                      | ND          | ND           | +         | +            | +           |

975 **Table 2.** Data on genomes of wild-type *Flavobacterium columnare* strains FCO-F2 and  
976 FCO-F9.

977

| 978 | Wild-type isolate | Genetic group | Genome size (bases) | N:o of ORFs | GC % |
|-----|-------------------|---------------|---------------------|-------------|------|
| 979 | FCO-F2            | C             | 3 221 312           | 3 280       | 31.7 |
| 980 | FCO-F9            | G             | 3 261 403           | 3 374       | 31.7 |

981 **Table 3.** Mutations revealed by whole genome sequencing (Illumina) in F2 phage-exposed *Flavobacterium columnare* isolates compared to their  
 982 wild type (wt) isolate FCO-F2. The isolates are shown according to the phage they were exposed to. CDS = coding sequence, → = change to,  
 983 Del = deletion, Ins = insertion, aa = amino acid.

| 985 (Phage) | 986 Phage-exposed isolate | 987 Colony morphology | 988 Gene/CDS                               | 989 Mutation   | 990 Location (base n:o) in wt genome | 991 Outcome                                                           |
|-------------|---------------------------|-----------------------|--------------------------------------------|----------------|--------------------------------------|-----------------------------------------------------------------------|
|             | 989 F2R58                 | 990 rhizoid           | 991 rlmF                                   | 992 T → A      | 993 21 350                           | 994 No aa change                                                      |
|             | 995 F2R60                 | 996 rough             | 997 sprA                                   | 998 Ins GT     | 999 1 314 323 – 1 314 324            | 1000 Change in reading frame → stop codon<br>→ two truncated proteins |
|             | 1001 F2R62                | 1002 rough            |                                            |                |                                      |                                                                       |
|             | 1003 (FCOV-F5)            |                       |                                            |                |                                      |                                                                       |
|             | 1004 F2R64                | 1005 rough            | 1006 sprA                                  | 1007 Ins G     | 1008 1 317 523                       | Change in reading frame → stop codon<br>→ two truncated proteins      |
|             | 1009 F2R65                | 1010 rough            | 1011 sprA                                  | 1012 Ins G     | 1013 1 317 524                       | Change in reading frame → stop codon<br>→ two truncated proteins      |
|             | 1014 F2R66                | 1015 rhizoid          |                                            |                |                                      |                                                                       |
|             | 1016 F2R67                | 1017 rough            | 1018 gldB                                  | 1019 Del T     | 1020 1 122 801                       | 1021 Truncated/wrong protein                                          |
|             | 1022 F2R68                | 1023 rough            |                                            |                |                                      |                                                                       |
|             | 1024 (FCOV-F25)           |                       |                                            |                |                                      |                                                                       |
|             | 1025 F2R70                | 1026 rough            | 1027 OmpH family outer<br>membrane protein | 1028 Ins G     | 1029 1 275 242                       | 1030 Change in reading frame<br>→ wrong protein                       |
|             | 1031 F2R72                | 1032 rough            | 1033 gldN                                  | 1034 Ins TCTAC | 1035 1 013 274 – 1 013 278           | 1036 Change in reading frame → stop codon<br>→ two truncated proteins |
|             | 1037 F2R74                | 1038 rough            | 1039 sprA                                  | 1040 Del A     | 1041 1 313 911                       | 1042 Change in reading frame → stop codon<br>→ two truncated proteins |

1009 **Table 4.** Mutations revealed by whole genome sequencing (Illumina) in F9 phage-exposed *Flavobacterium columnare* isolates compared to their  
 1010 wild type (wt) isolate FCO-F9. The isolates are shown according to the phage they were exposed to. CDS = coding sequence, → = change to,  
 1011 Del = deletion, nt = nucleotide, Ins = insertion, aa = amino acid  
 1012

| 1013 (Phage)    | 1014 Phage-exposed isolate | 1015 Colony morphology | 1016 Gene/CDS                                | 1017 Mutation | 1018 Location (base n:o) in wt genome | 1019 Outcome                                                |
|-----------------|----------------------------|------------------------|----------------------------------------------|---------------|---------------------------------------|-------------------------------------------------------------|
|                 | F9R56                      | rhizoid                | DegT/DnrJ/EryC1/StrS family aminotransferase | C → T         | 657 725                               | Cys → Tyr                                                   |
|                 |                            |                        | DUF255 domain -containing protein            | C → T         | 2 542 435                             | Stop codon → truncated protein                              |
|                 | F9R58                      | rough                  |                                              |               |                                       |                                                             |
|                 | F9R61                      | rough                  | Cystathionine gamma-synthase                 | G → A         | 1 720 857                             | His → Tyr                                                   |
| 1024 (FCOV-F13) | F9R64                      | rough                  | gldM                                         | Del CAA       | 2 732 551                             | Del Thr                                                     |
|                 | F9R66                      | rough                  | Gliding motility                             | G → A         | 1 849 668                             | Stop codon → truncated protein                              |
|                 | F9R69                      | soft                   | gldM                                         | Del 255 3' nt | 2 732 457 –                           | No/truncated protein                                        |
|                 |                            |                        | gldN                                         | Del CDS       |                                       | No protein                                                  |
|                 |                            |                        | FAD-binding oxidoreductase                   | Del CDS       |                                       | No protein                                                  |
|                 |                            |                        | DUF3492 domain containing protein            | Del CDS       |                                       | No protein                                                  |
|                 |                            |                        | Hypothetical protein                         | Del 454 5' nt | – 2 737 157                           | No/truncated protein                                        |
| 1033 (FCOV-F45) | F9R72                      | rough                  | gldG                                         | Ins T         | 3 023 647                             | Change in reading frame<br>→ wrong protein                  |
|                 | F9R75                      | rough                  | gldN                                         | Ins G         | 2 733 099                             | Start and stop codon<br>→ two truncated proteins            |
|                 | F9R78                      | rough                  | gldM                                         | Ins A         | 2 731 567                             | Change in reading frame<br>→ stop codon → truncated protein |

1040 **Table 5.** *Flavobacterium columnare* isolates and phages used in this study. Bacteria and  
1041 phages were isolated from Finnish fish farms. *F. columnare* isolates have previously been  
1042 categorized into genetic groups by restriction fragment length polymorphism analysis of  
1043 internal transcribed spacer region between 16S and 23S rRNA genes (This article was  
1044 submitted to an online preprint archive [36]).

| Bacterium isolate | Genetic group of the bacterium | Phage isolate | Genetic group of the phage | isolation host | Farm number | Isolation year |
|-------------------|--------------------------------|---------------|----------------------------|----------------|-------------|----------------|
| FCO-F2            | C                              |               |                            |                | 1           | 2017           |
| FCO-F9            | G                              |               |                            |                | 2           | 2017           |
|                   |                                | FCOV-F2       | C                          |                | 1           | 2017           |
|                   |                                | FCOV-F5       | C                          |                | 3           | 2017           |
|                   |                                | FCOV-F25      | C                          |                | 1           | 2017           |
|                   |                                | FCL-2         | G                          |                | 2           | 2009           |
|                   |                                | FCOV-F13      | G                          |                | 1           | 2017           |
|                   |                                | FCOV-F45      | G                          |                | 2           | 2017           |

1056

1057 **Table 6.** Accession numbers of whole genome sequences of wild-type *Flavobacterium*  
1058 *columnare* isolates FCO-F2 and FCO-F9 and their phage-exposed (F2R- and F9R) and no-  
1059 phage control (F2S- and F9S-) isolates submitted to GenBank.

| 1060 | Isolate | Accession number |
|------|---------|------------------|
| 1061 | FCO-F2  | CPO51861         |
| 1062 | F2R58   | CP054506         |
| 1063 | F2R60   | CP054505         |
| 1064 | F2R62   | CP054504         |
| 1065 | F2R64   | CP054503         |
| 1066 | F2R65   | CP054502         |
| 1067 | F2R66   | CP054501         |
| 1068 | F2R67   | CP054500         |
| 1069 | F2R68   | CP054499         |
| 1070 | F2R70   | CP054498         |
| 1071 | F2R72   | CP054497         |
| 1072 | F2R74   | CP054496         |
| 1073 | F2S4    | CP054495         |
| 1074 | F2S17   | CP054494         |
| 1075 | FCO-F9  | CP054518         |
| 1076 | F9R56   | CP054517         |
| 1077 | F9R58   | CP054516         |
| 1078 | F9R61   | CP054515         |
| 1079 | F9R64   | CP054514         |
| 1080 | F9R66   | CP054513         |
| 1081 | F9R69   | CP054512         |
| 1082 | F9R72   | CP054511         |
| 1083 | F9R75   | CP054510         |
| 1084 | F9R78   | CP054509         |
| 1085 | F9S15   | CP054508         |
| 1086 | F9S17   | CP054507         |
| 1087 |         |                  |
